# Supplementary material for: Potential-dependent interfacial specific adsorption accelerates charge transfer in sodium-ion batteries
Source: Research Square preprint supplement (doi:10.21203/rs.3.rs-6307444/v1), 2025-04-10
Supplement: Supplementary file 1 [file e7ca69d84e8e4462c77bc093.docx]

**Potential-dependent interfacial specific adsorption accelerates charge transfer in sodium-ion batteries**

**Supplementary Information**

**Supplementary Note 1**:

During the charging process, two electrochemical reactions occur at the interface between the cathode particles and electrolyte, which are charge transfer due to specific adsorption on the cathode surface and charge transfer due to oxidation of elements in the bulk. Taking the specific adsorption of ClO– 4 as an example, the chemical reaction formula for specific adsorption is

(S1)

where *M* represents the cathode material and (M·ClO4) represents the cathode with ClO− 4 adsorbed. At steady state, the current generated by the reaction (S1) is

(S2)

where *I*+1 is the current generated by the adsorption process (forward reaction) and *I*−1 is the current generated by the desorption process (reverse reaction). The chemical reaction formula for the oxidation of the cathode is

(S3)

At steady state, the current generated by the reaction S3 is

(S4)

where *I*1 is the Faraday current density at solvent-adsorbed sites and *I*2 is the Faraday current density at anion-adsorbed sites. Here, we introduce the state variable *θ* (anion coverage on the anodic surface) to represent the degree of anion specific adsorption and let Ξ be the change rate of the surface state variable *θ* with respect to time *t*, while Ξ is a function of the electrode potential *E* and the state variable *θ*, gives

(S5)

In steady state, the variation of *E*, *θ* with respect to time *t* is 0. Therefore, when *θ* receives a small signal perturbation in the EIS tests, the response should satisfy the linear condition. Taking the linear term to the Taylor's formula of equation (S6), gives

(S6)

In the EIS tests, when a sine signal of angular frequency *ω* is applied, the corresponding signal of Δ*θ* should also be a sine signal of the same angular frequency. The relationship between the change rate Ξ and the state variable *θ* can then be expressed linearly through the angular frequency *ω*, gives

(S7)

Combining equation (S6) and equation (S7), yields

(S8)

Let

(S9)

(S10)

gives

(S11)

For general electrode reaction equation (S3), the Faraday current density *IF*, which expresses the rate of electrode reaction, is a function of the electrode potential *E*, the surface state variable *Xi*, and the concentration *Cj* of the reacting substance at the surface:

(S12)

in which *i=*1*, ···, n*; *j=*1*, ···, n.* In the sodium-ion battery system considered in this paper, the state variables *Xi* are only the anion coverage *θ* after neglecting the concentration polarization. Based on the linearity condition of EIS tests, after applying a slight perturbation Δ*E* to the potential at steady state, the state variable and the Faraday current also show corresponding changes Δ*θ* and Δ*IF*. Thus, taking a primary term for the Taylor's formula of equation (S12), gives

(S13)

According to the definition of Faraday conductance of the electrode process: , we have

(S14)

where . In the equivalent circuit (Supplementary Fig. 22), *Rt* represents the direct effect of the potential on the Faraday current, and in the sodium-ion battery system represents the contact impedance between particles, conductive agents and collectors. Let and substitute equation (S11) into equation (S14), we obtain

(S15)

According to the stability condition of EIS tests, when *E* returns to its original steady state from the deviated state, *IF* returns to its original steady state as well. Therefore, when containing only one state variable *θ*, the Jacobi matrix is required to be negative real, i.e., . Let

(S16)

and for the inductive loop as shown in Fig. 4e, the following conditions must be satisfied

(S17)

Based on the practical physical implications, it is required that and . represents the equivalent resistance and *L* represents the equivalent inductance for anion specific adsorption.

At steady state, the change rate of the anion coverage Ξ*ss*= 0, thus

(S18)

In the continuous electrode interface system, then

(S19)

Substituting into equation (S17), we get

(S20)

The second subpart indicates that the potential *E* changes the Faraday current *IF* by changing the surface anion coverage *θ*. According to equation (S17), the electrode interface system generates an inductive frequency response under the condition that the second subpart of equation (S20) is constant positive, which requires and to be same positive or negative. Mathematically, for equation (S20), it is necessary to make *b* and *m* equally positive or negative for the inductive frequency response.

The forward reaction of the reaction equation (S1) represents the adsorption process and the reverse reaction represents the desorption process. The change rate of the anion coverage Ξ is linearly related to the reaction current, then

(S21)

*K* is the conversion equivalence factor. Substituting equation (S21) into equation (S10), yields

(S22)

According to the Butler-Volmer equation, the relationship between the Faraday current generated by potential *E* is

(S23)

where is the transfer factor for the reaction S1 and *n* is the number of transferred electrons and *n* = 1, ,, and *F* is the Faraday constant. Substituting back into equation (S22), we get

(S24)

The physical meaning of the positive *b* is that the anion coverage *θ* increases with the rising electrode potential *E*.

According to equation (S4), we get

(S25)

According to the Butler-Volmer equation, the current densities across solvent-adsorbed sites and anion-adsorbed sites are

(S26)

Substituting back into equation (S25), we get

(S27)

At low voltages, the small number of adsorbed anions on the surface makes

(S28)

At this stage, *m* > 0, and inductive frequency response occurs. When the potential increases, the anion coverage , allowing

(S29)

At this stage, , and capacitive frequency response occurs. Overall, tends to change positively and then negatively as the potential increases, which explains the transition from inductive to capacitive signals in the GEIS tests. The corresponding physical meaning is that a moderate amount of anion specific adsorption promotes Faraday currents *IF* at low voltages, while excess adsorbed anions act as inhibitors at high voltages.


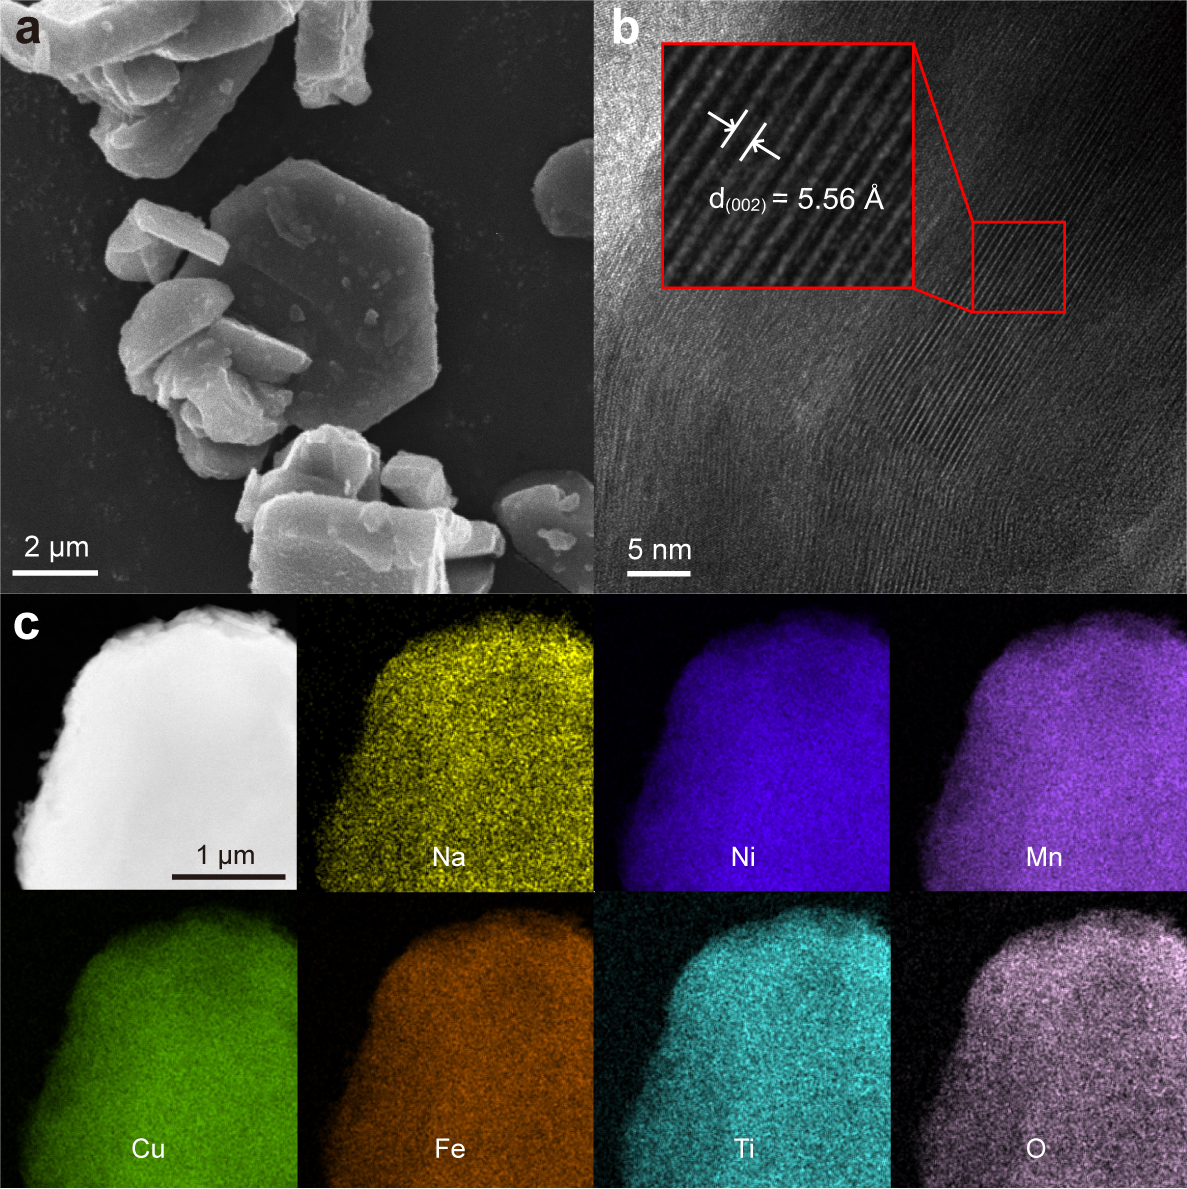


**Supplementary Figure 1.** SEM (a) and HR-TEM (b) images of NMCFT powder. The EDS mapping images (c) reveals that all elements are uniformly distributed in the bulk of NMCFT, including small amounts of Cu, Fe and Ti.


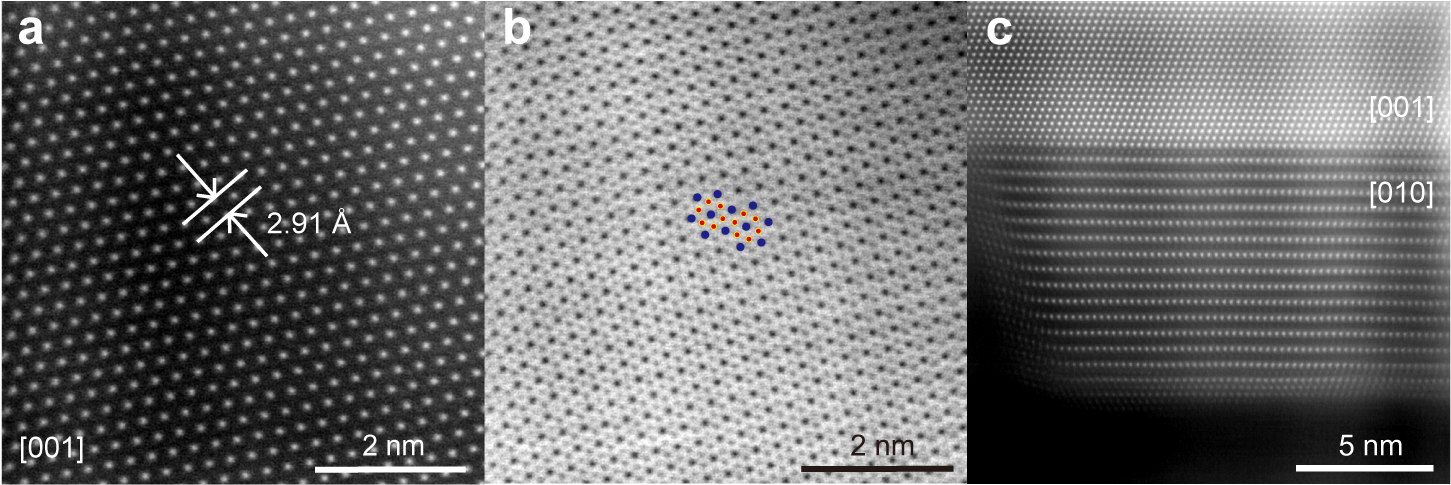


**Supplementary Figure 2.** HAADF (a) and ABF (b)-STEM images obtained from [001] zone axis direction. Combined with the STEM images of [010] zone axis direction in Fig. 1, the typical P2-type layered structure of NMCFT can be identified. (c) The HAADF-STEM image from the special direction close to [011] zone axis. Atomic-level imaging of the surface of the layered structure can be seen, and the interfaces of the particles vertical to the [010] zone axis direction are considered to be active surfaces where charge transfer and adsorption occur.1

The TM layer spacing d (001) of NMCFT was 5.56 Å when viewed at the [010] zone axis, and the P-type stacking structure of transition metal and oxygen atoms was clearly demonstrated in the ABF image. From the [001] zone axis direction, the length of a-axis was 2.91 Å and the hexagonal arrangement of the transition metal in the ABF image was clear.


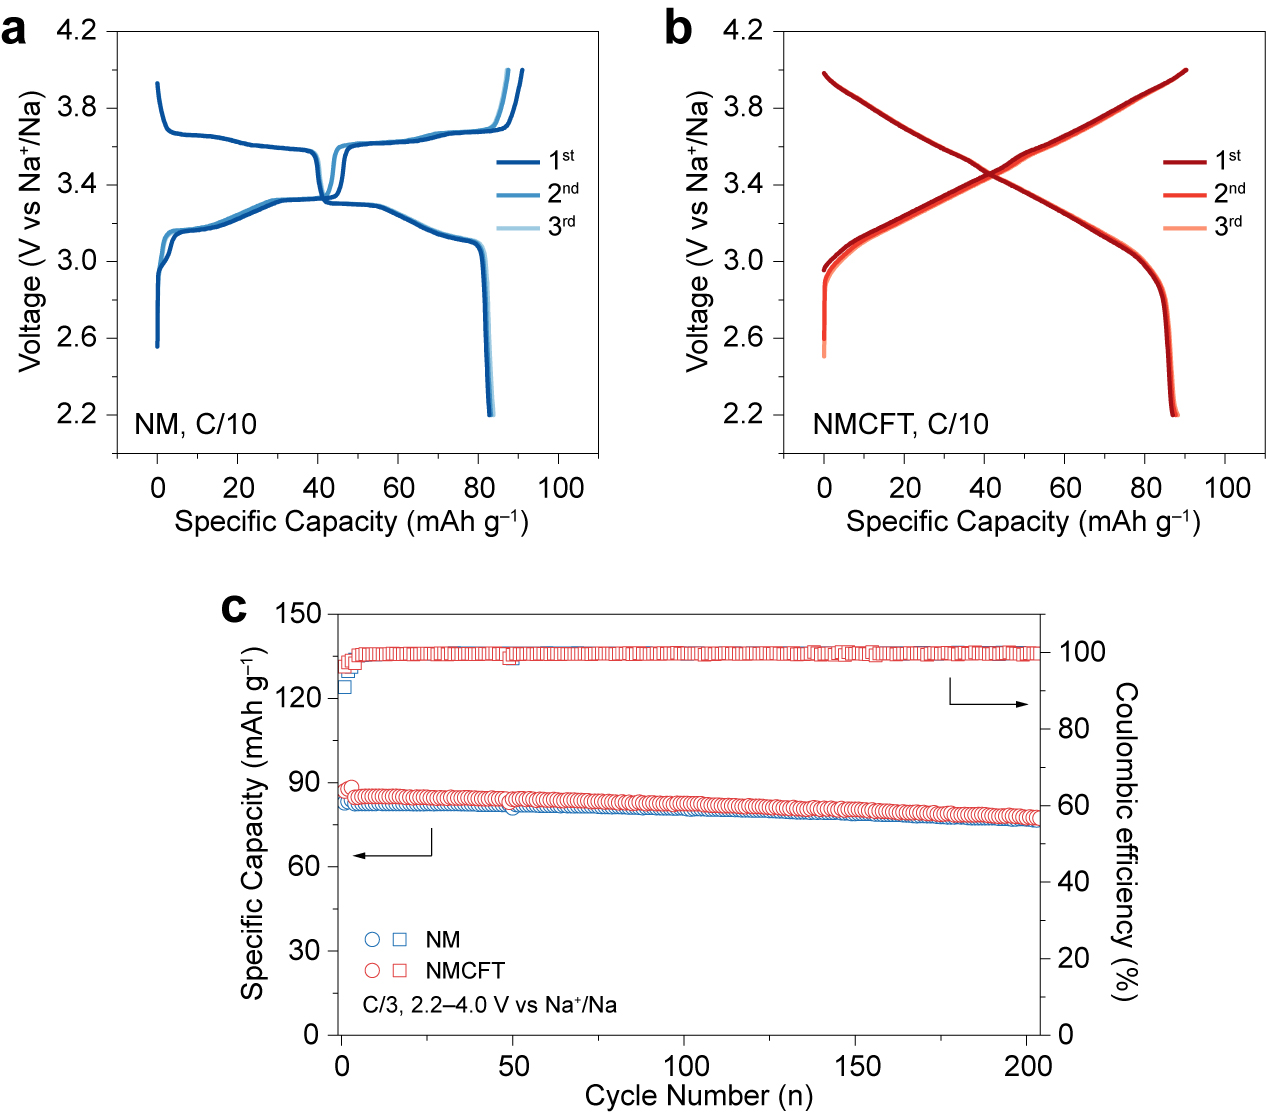


**Supplementary Figure 3.** The charge/discharge curves of NM || Na (a) and NMCFT || Na (b) half-cells activated for three cycles at C/10 under 2.2−4.0 V. The cycling performance (c) of NM and NMCFT at C/3 under 2.2−4.0 V. Activating at C/10 for three cycles at the beginning.


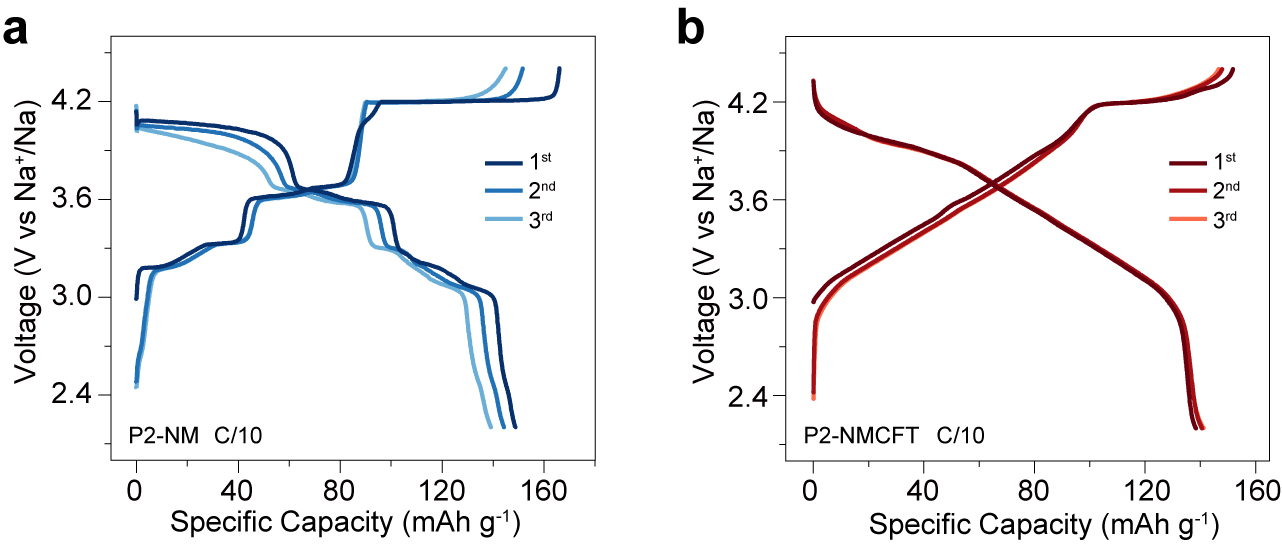


**Supplementary Figure 4.** The charge/discharge curves of NM || Na (a) and NMCFT || Na (b) half-cells activated for three cycles at C/10 under 2.2−4.4 V. NMCFT cathode exhibits a specific capacity of 141 mAh g−1 at C/10 and NM has a higher initial specific capacity (~150 mAh g−1) but with obvious attenuation.


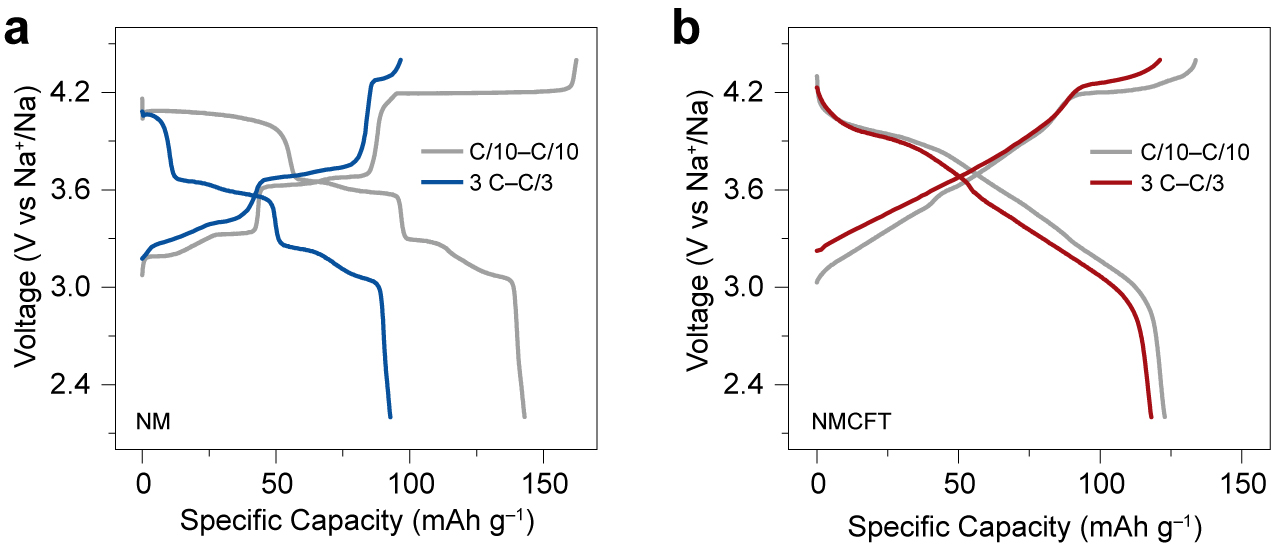


**Supplementary Figure 5**. The fast-charging (3 C) and slow-discharging (C/3) curves of NM (a) and NMCFT (b) cathodes. The initial GCDs at C/10 are indicated by the gray lines for comparison.


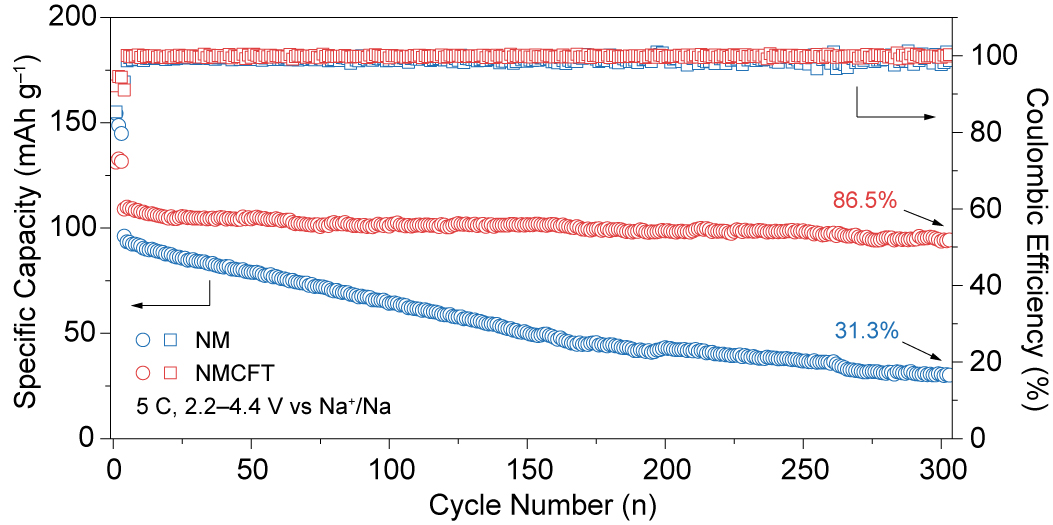


**Supplementary Figure 6.** Long-term and high-rate cycling performance of NM and NMCFT at 5 C in the voltage range of 2.2−4.4 V.

**
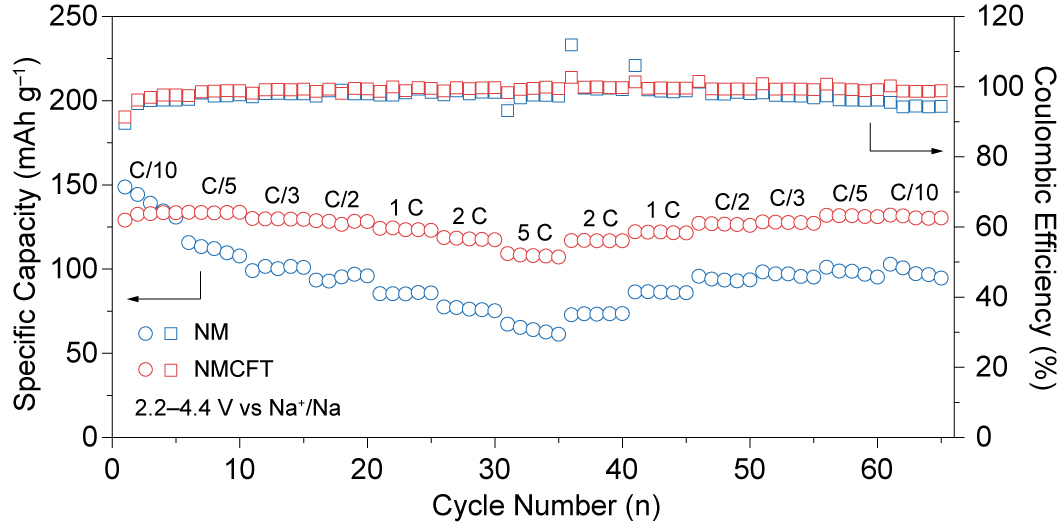
**

**Supplementary Figure 7.** Asymptotic rate performance comparison of NM and NMCFT. Charging and discharging at each current density for 5 cycles and then switching to another current density.


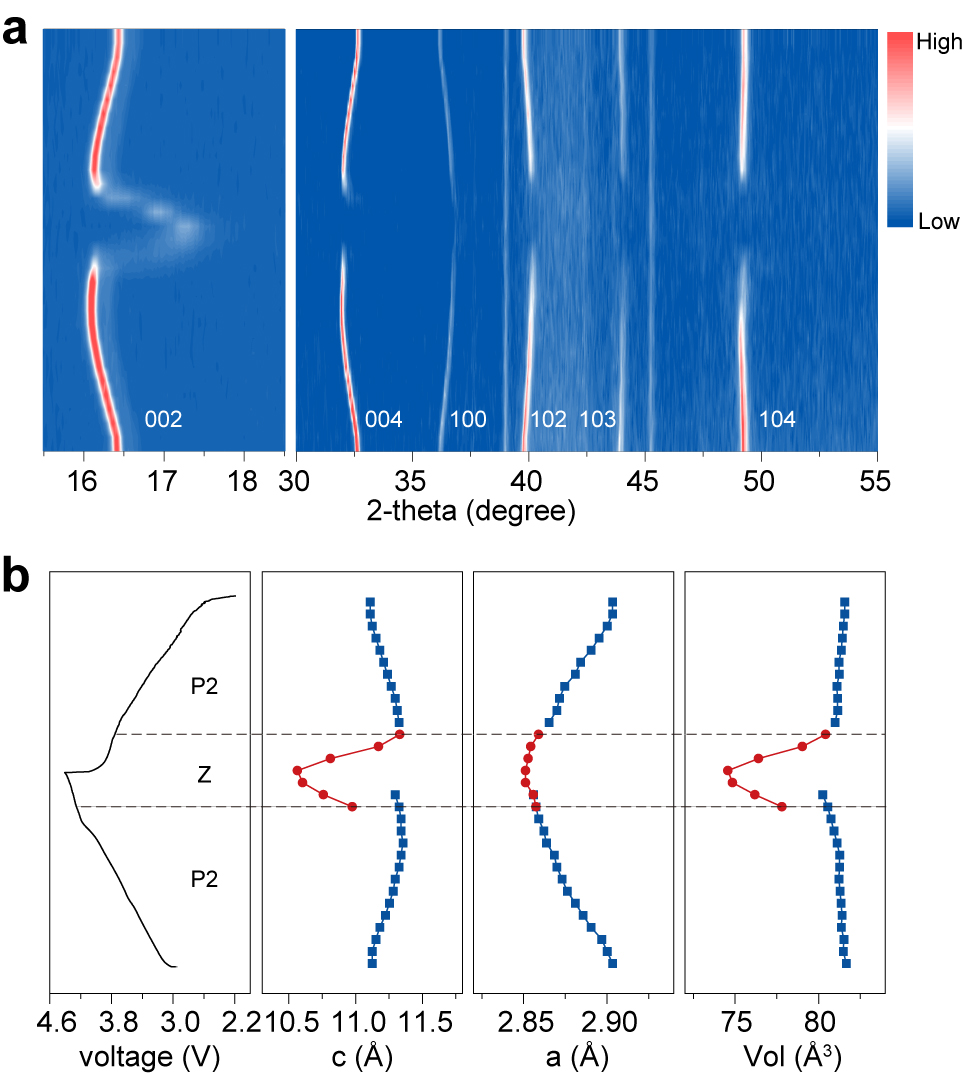


**Supplementary Figure 8**. Contour plots of the *in-situ* XRD (a) and evolution of lattice parameters (b) of NMCFT during charging and discharging. The parameters of the P2-type and Z-type structure are represented by blue and red dotted lines, respectively.

During the charging process, the (002) peak shifted to left, indicating that the elimination of Na+ reduced the electrostatic shielding effect on the repulsive forces between the O stackings, consequently resulting in the lengthening of the c-axis of P-type cell. This trend changed at 4.25 V, as the long-range ordering of the P-type structure was disrupted by the random appearance of O-type stackings, and thus the Z-phase appeared. Upon charging to 4.4 V, the lattice volume of the NMCFT shrinks to 91% of the initial state. However, upon discharging to 2.2 V, the P2-type structure reappeared and the lattice structure remained almost unchanged, indicating that the P2−Z phase transition of the NMCFT was well reversible.


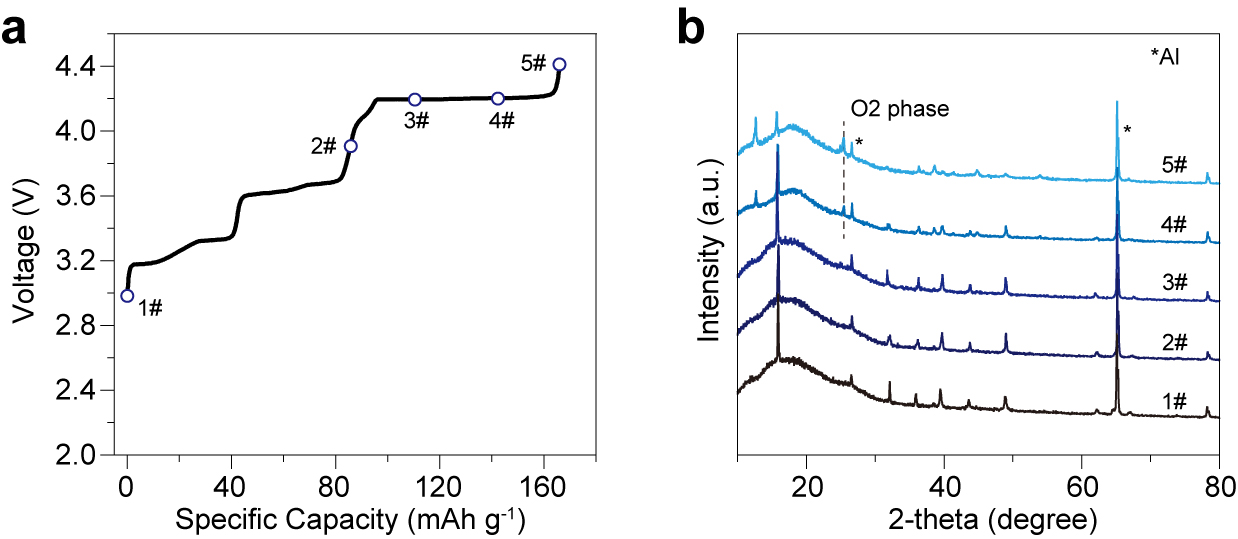


**Supplementary Figure 9.** *Ex-situ* XRD measurements in the high-voltage region during NM charging. The peaks of the Al foil were marked with an asterisk. The broad peak at 20 degrees is the signal from the PI film wrapped around the electrode. The XRD spectra showed no peaks of O2 phase at points 2# and 3#, when the huge overpotential had been generated. It was not until charging to the second half of the high-voltage plateau (4#) that distinct peaks of the O2 phase appear.


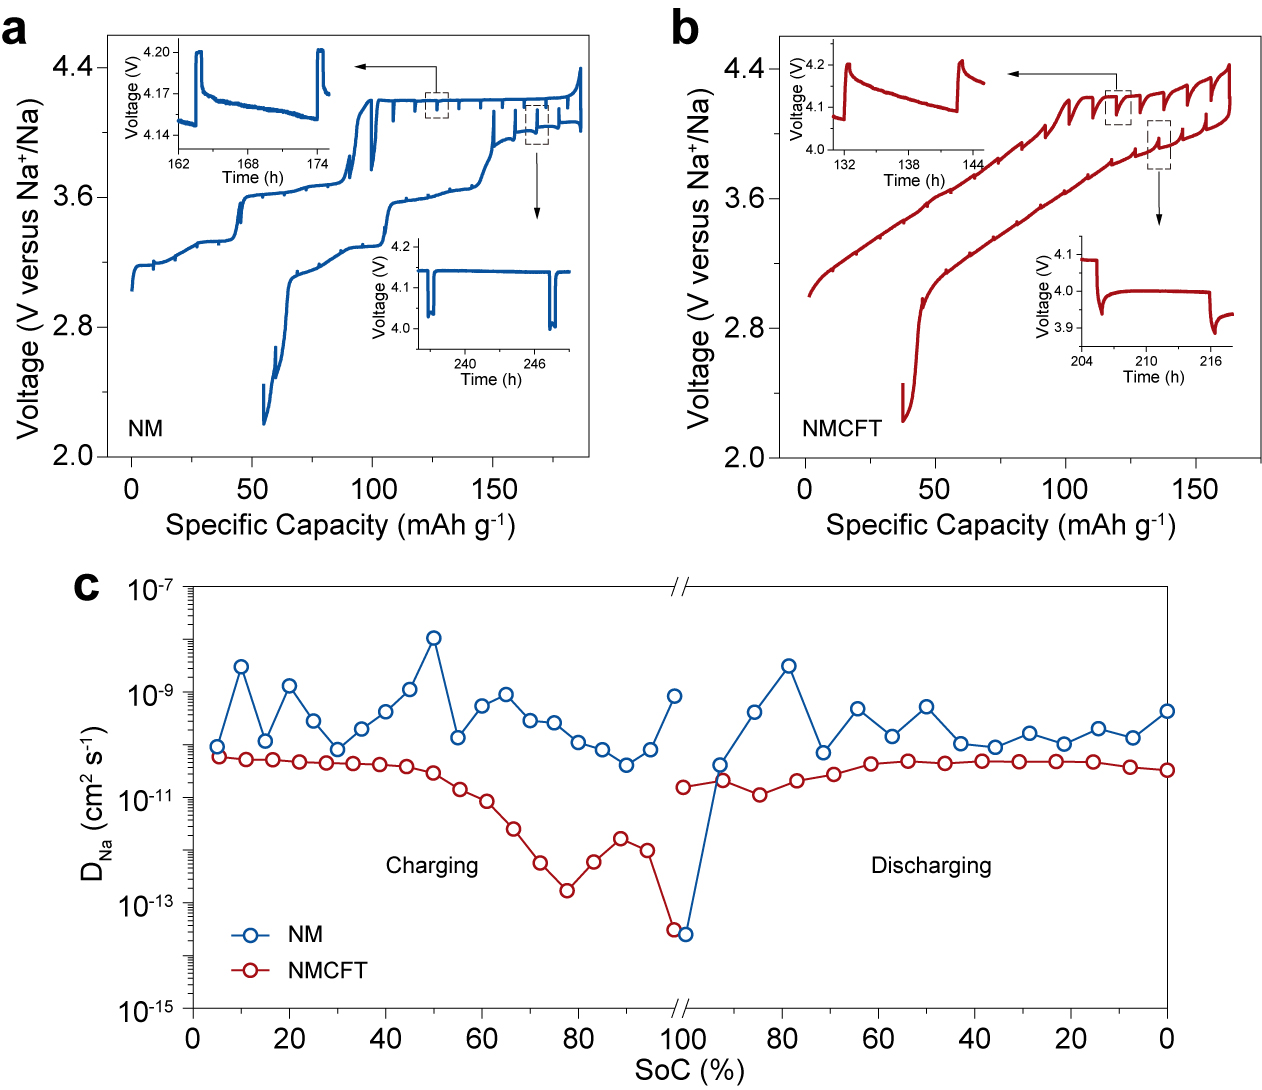


**Supplementary Figure 10.** GITT measurements for NM (a) and NMCFT (b) and calculated Na+ diffusion coefficients (c) of NM and NMCFT from GITT results. A constant current pulse was applied for 30 minutes followed by 10 hours of relaxation. The insets show the voltage-time curve of the relaxation process in the high-voltage region.

For NM, the relaxation process at high-voltage region first undergoes Ohmic resistance (IR drop) and then decreased by only 0.03 V within 10 h. While for the NMCFT, the relaxation curve consistently decreased by 0.1 V within 10 h and seemed to be never-ending. The Na+ diffusion coefficients are calculated from

(S30)

where *m*B and *M*B are mass and molecular weight of the active material, respectively. *V*m is the cell volume. The calculated Na+ diffusion coefficients of NM are above 10−11 cm2 S−1 on average, while the Na+ diffusion coefficients of NMCFT are below 10−10 cm2 S−1 and even close to 10−13 cm2 S−1 in the high-voltage region.


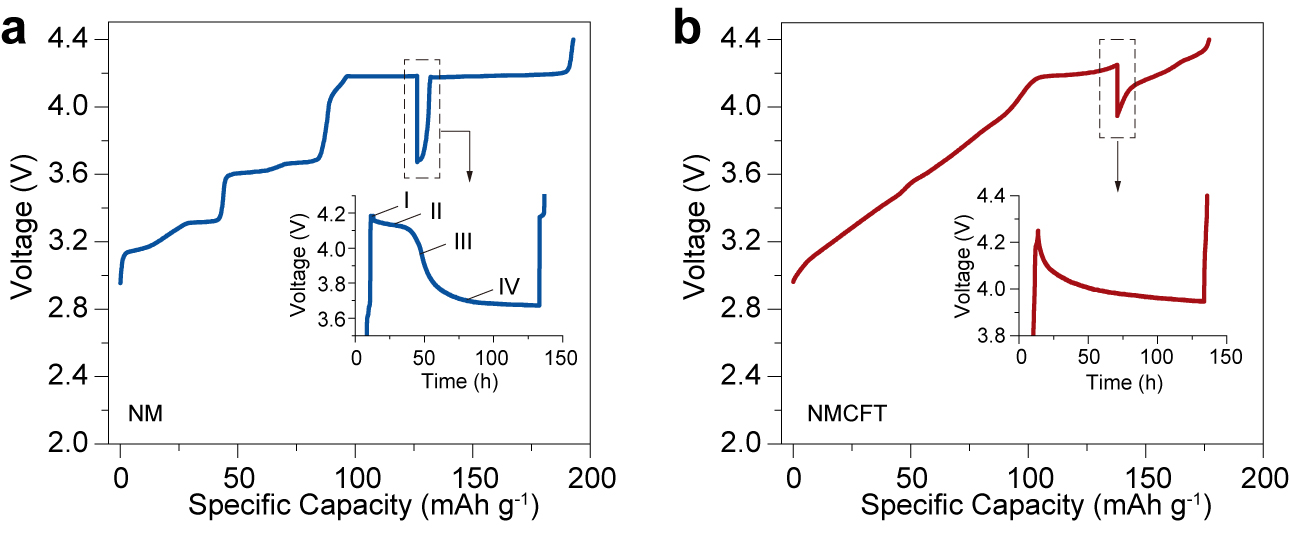


**Supplementary Figure 11.** Long-period relaxation tests for NM (a) and NMCFT (b). The insets show the voltage-time curve for observing the voltage change during relaxation. The relaxation process was carried out for 120 h, and the ambient temperature was kept at 25 ℃. The NM started to relax after charging for 7 h and the NMCFT starts to relax after charging to 4.25 V to ensure that both cathodes are at high SoC.

Depending on the time scale, the reentry of NM from the polarized potential to the equilibrium potential is divided into four stages.2 The first stage corresponds to the ohmic polarization, which occurs at the instant of disappearance of the current pulse. The second stage occurs within 20 h of relaxation, and the voltage drop in this stage is slow and less than 0.08 V, which corresponds to the kinetic polarization induced by the P2−O2 phase transition. After 30 h, the relaxation enters the third stage, which corresponds to polarization voltages as high as 0.4 V, resulting from thermodynamic polarization due to O redox. The fourth stage occurs when the voltage relaxed below 3.8 V and is the slowest process on the time scale. This may be the polarization voltage due to Na+/vacancy ordering, which requires spontaneous diffusion of Na+ to disorder the Na+/vacancy arrangement.3 In NMCFT, the P2−O2 biphasic reaction is suppressed and replaced by the P2−Z homogeneous reaction, eliminating the kinetic hysteresis of Na+ diffusion. Therefore, the relaxation process of NMCFT consists only of the relaxation of the instantaneous ohmic polarization and the sluggish thermodynamic polarization.


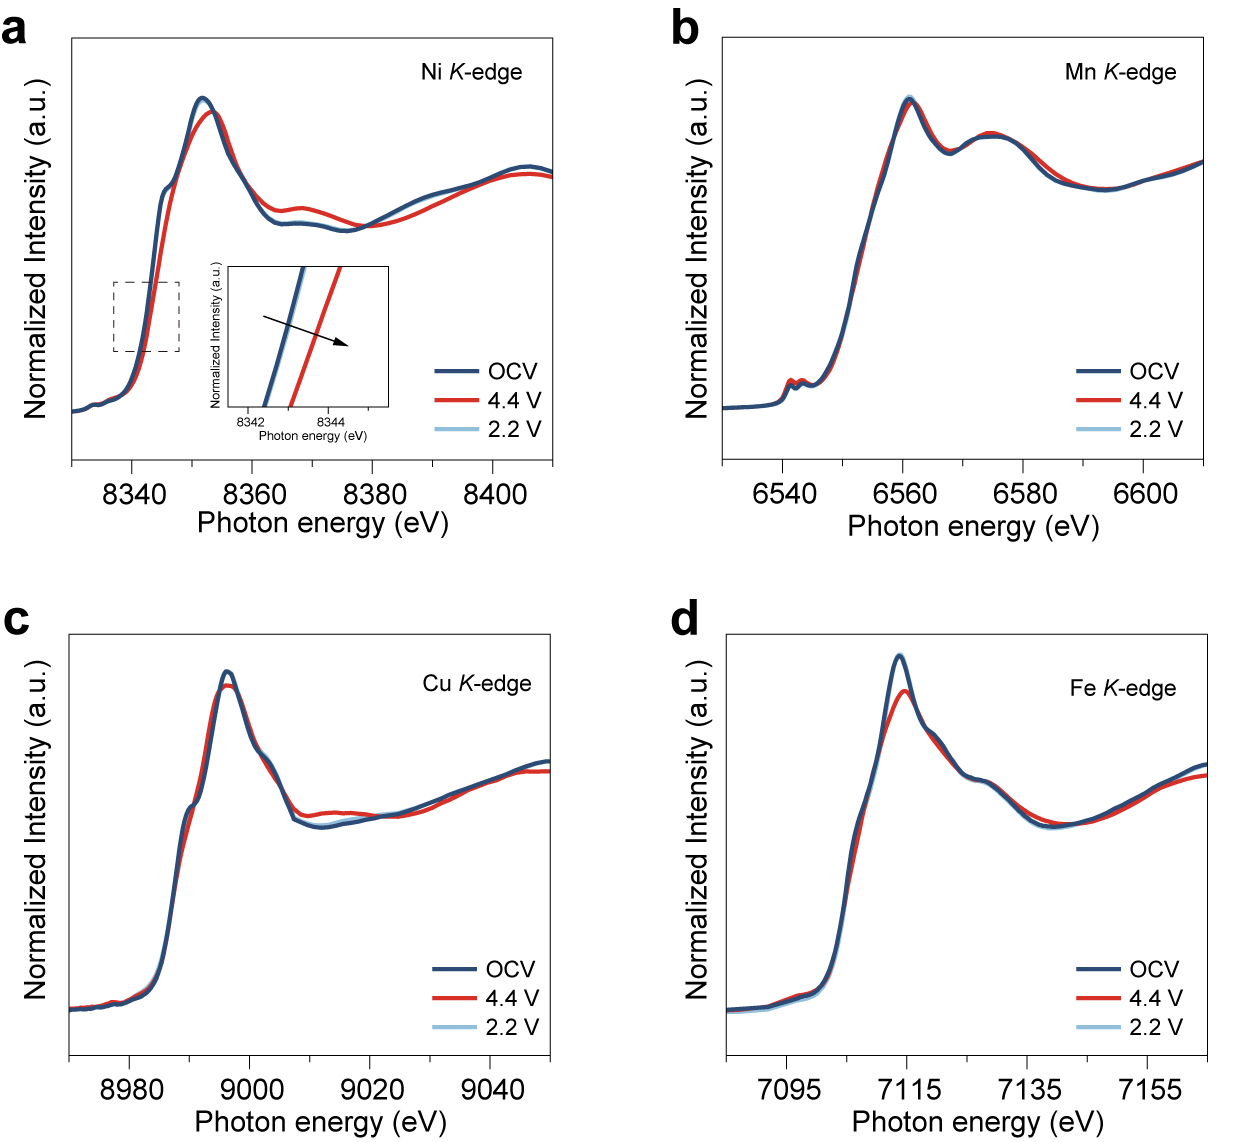


**Supplementary Figure 12.** Normalized TM *K*-edge XANE of NMCFT at different states. The near-edge of the Ni *K*-edge is significantly shifted, suggesting that Ni is oxidized from the +2 valence to a higher valence state at 4.4 V SoC. The near edges of Cu and Fe *K*-edge are almost unshifted, but the spectral shape changes, indicating distortions of the coordination structure.


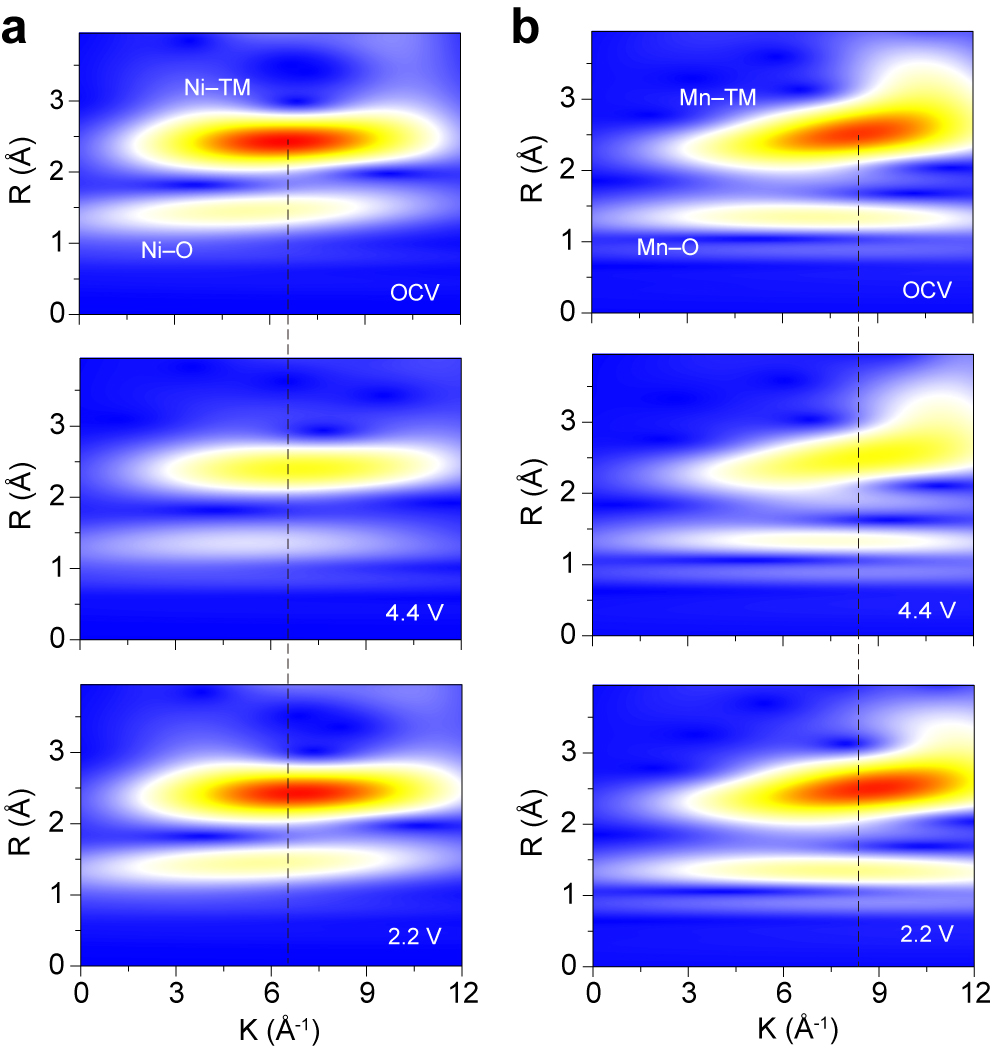


**Supplementary Figure 13.** Wavelet transforms (WT)-EXAFS spectra at the Ni *K*-edge (a) and Mn *K*-edge (b) of NMCFT at different states. The wavevector K of Ni−TM and Mn−TM shell peaks are constant in each state except for the intensity change.


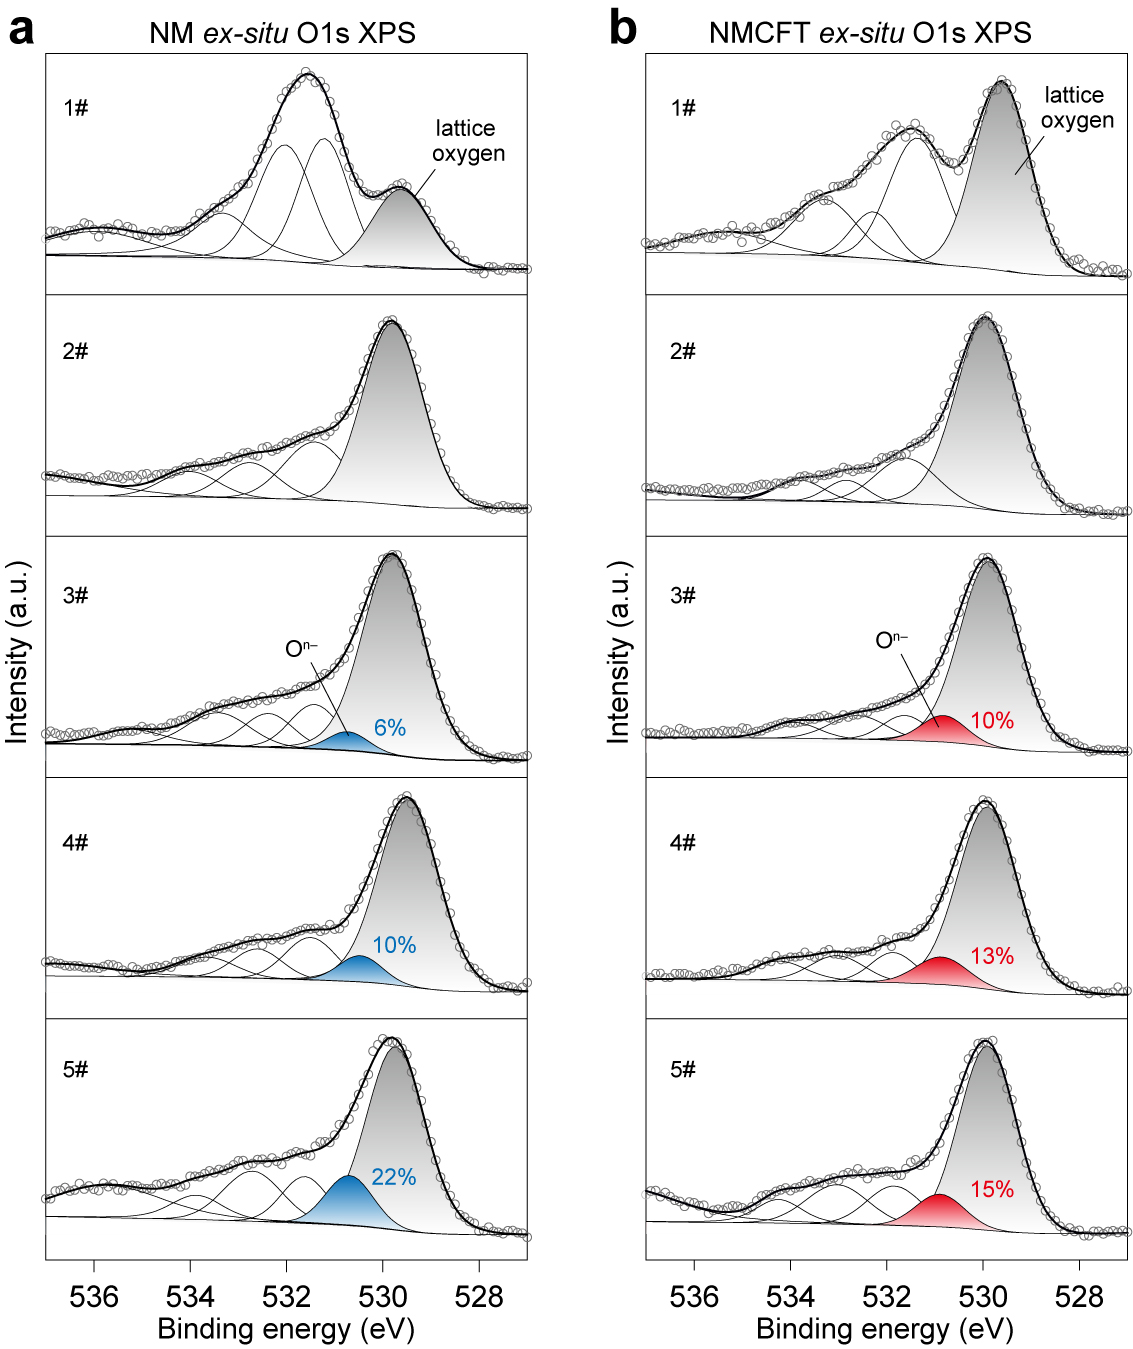


**Supplementary Figure 14.** Ex situ O 1s XPS results during the first charging of NM (a) and NMCFT (b). The charging state of the samples corresponds to the numbers as depicted in Fig. 2g, h. For a clearer observation of the lattice O evolution, all samples, except those in the pristine state, were etched for 60 s for testing. By peak splitting and fitting, three different oxygen species can be obtained: the lattice O2− at 529.5 eV (filled in grey), the oxidized oxygen On− (0 < n < 2) at 530.5 eV (filled in bule or red) and the organic species of O with higher binding energy. The percentages indicate the area ratio of the On− peak to the O2−peak.


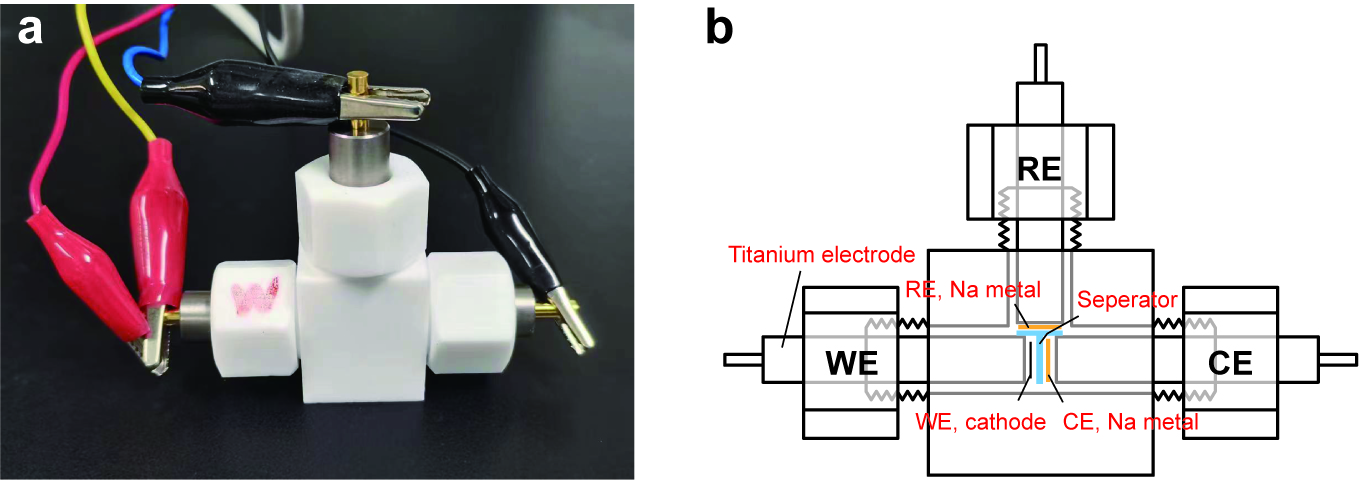


**Supplementary Figure 15**. Photograph (a) and schematic construction (b) of Swagelok three-electrodes cell.


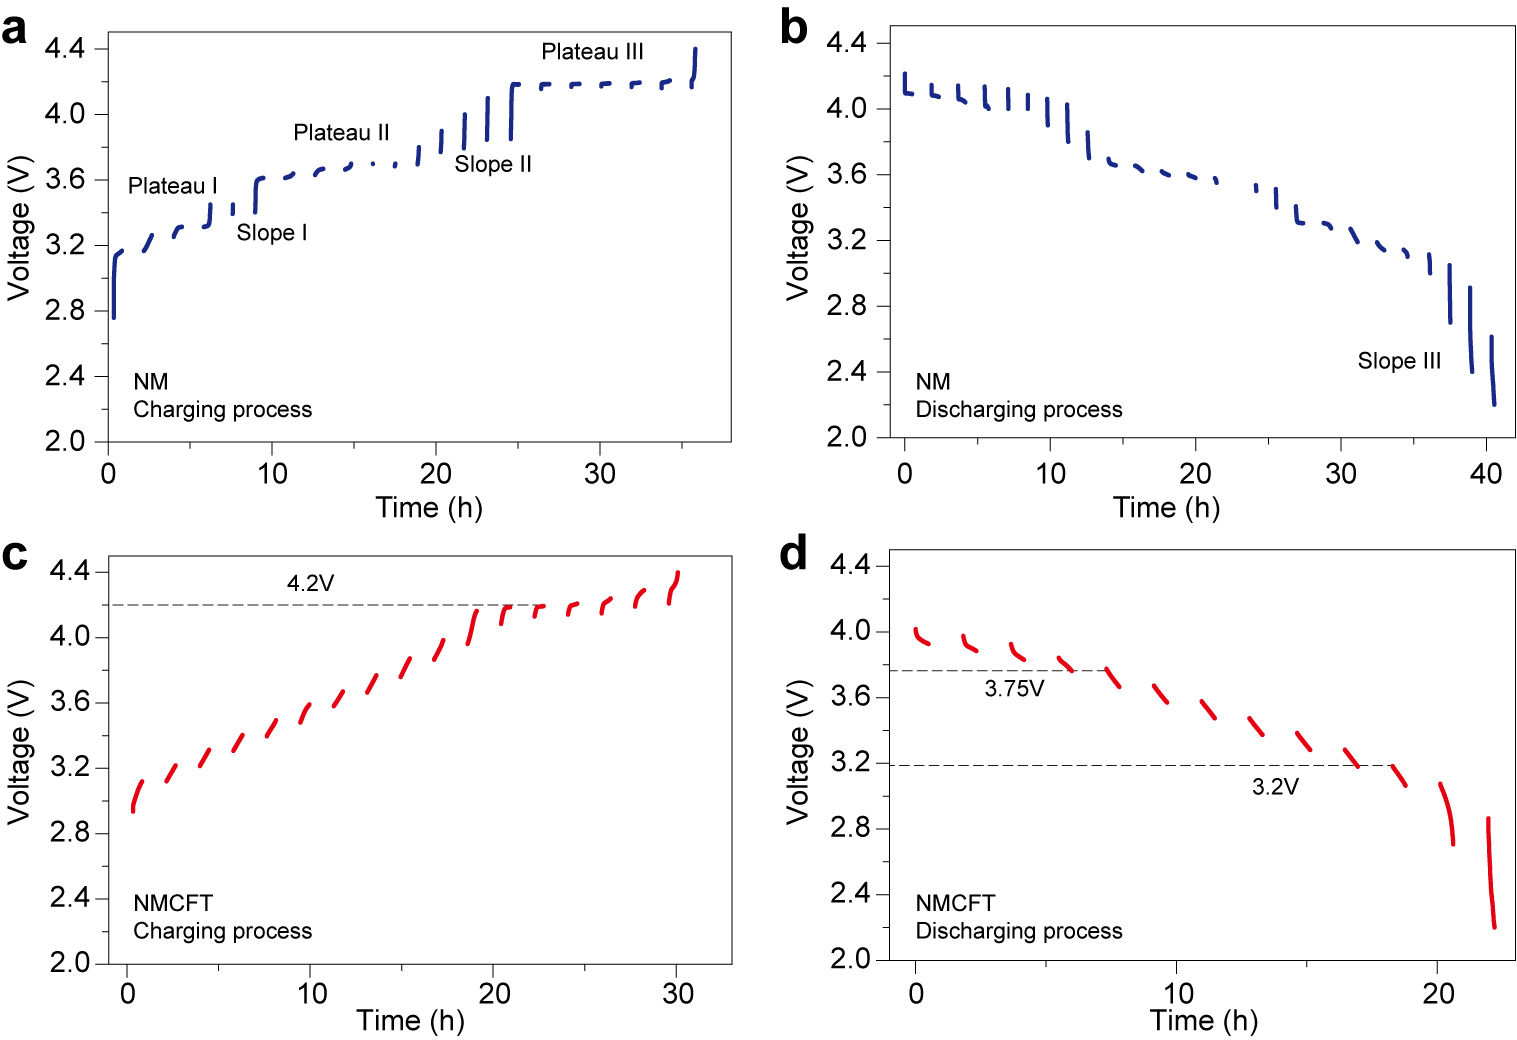


**Supplementary Figure 16.** Voltage-time curves of three-electrodes cells with NM (a, b) and NMCFT (c, d) as work electrodes. The voltage is actually the potential difference between the working electrode (cathode) and the reference electrode (clean and unchanged Na metal).

The charging curve of the NM was divided into five parts according to the plateaus and abrupt changes of voltage. In addition to the fact that the part above 3.0 V can be regarded as the inverse of the charging process, the slope III is added to describe the discharging process below the open-circuit voltage (~2.9 V). For NMCFT, the charging process is divided into two stages bounded by 4.2 V and the discharging process is bounded by 3.75 V corresponding to the inverse of the charging process. The part below 3.2V is considered as an additional stage, corresponding to the appearance of Rct in Fig. 2b of the main text.


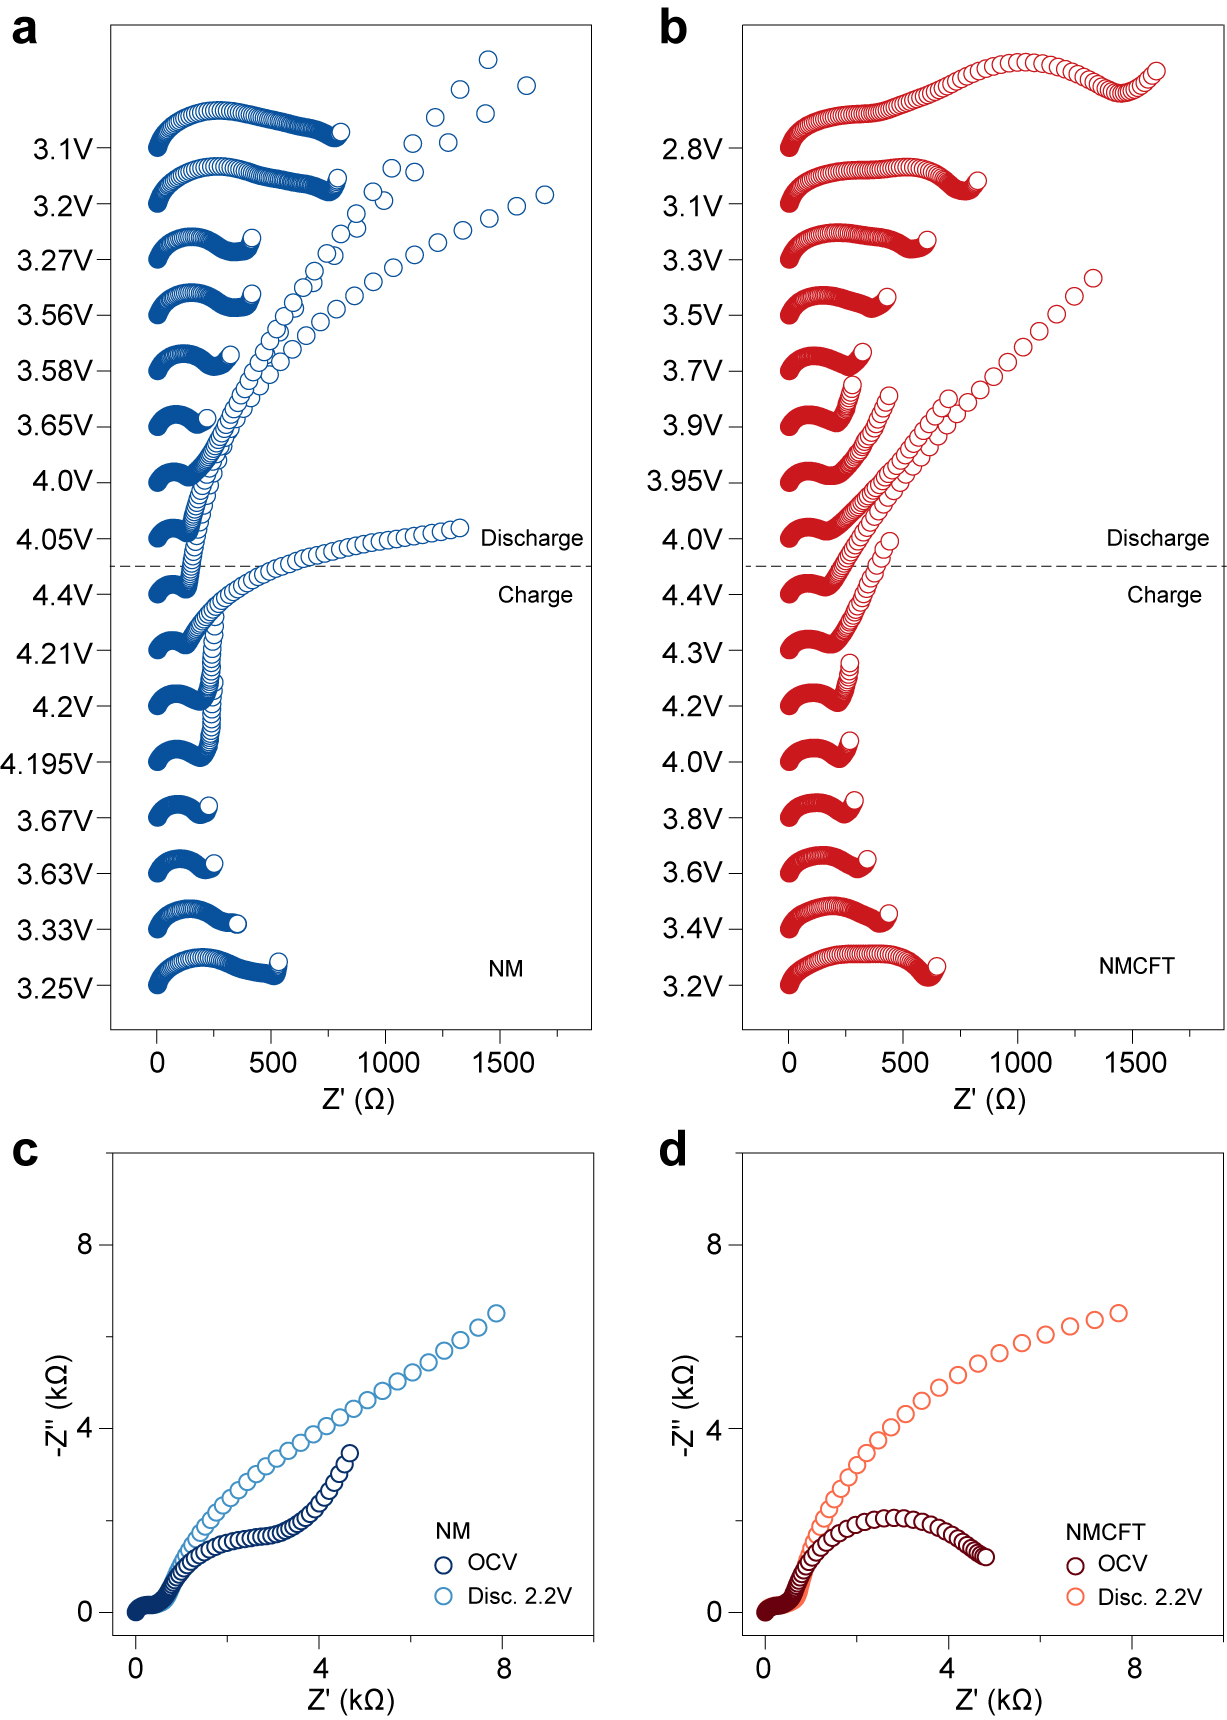


**Supplementary Figure 17.** GEIS measurements for coin cells of NM || Na (a) and NMCFT || Na (b). The Nyquist plots in the pristine and discharged states are shown additionally in (c) and (d) due to the excessively large Rct arcs. In the coin cells, the trend of the mid-frequency arc representing the Rct and the low-frequency region representing the diffusion is consistent with the results of the three-electrode test in Fig. 4.

In the coin cells, the anode (Na metal) acted as both the counter electrode (CE) and reference electrode (RE), which caused the information of the charge transfer process on the Na surface to be displayed in the mid-frequency region of the EIS, thus counteracting the inductive signals. In the three-electrodes cells, electrons were transferred through the outer circuits of the work electrode (WE) and CE, and Na+ diffused through the inner pathway of WE-electrolyte-CE. Electrons and ions transfer would never transfer through the RE, so the current response did not change the surface state of the RE when a small signal of voltage was applied between the WE and the RE. As a result, the interfacial state variables of WE (P2-type layered cathodes) could be more clearly observed in the three-electrodes cells.


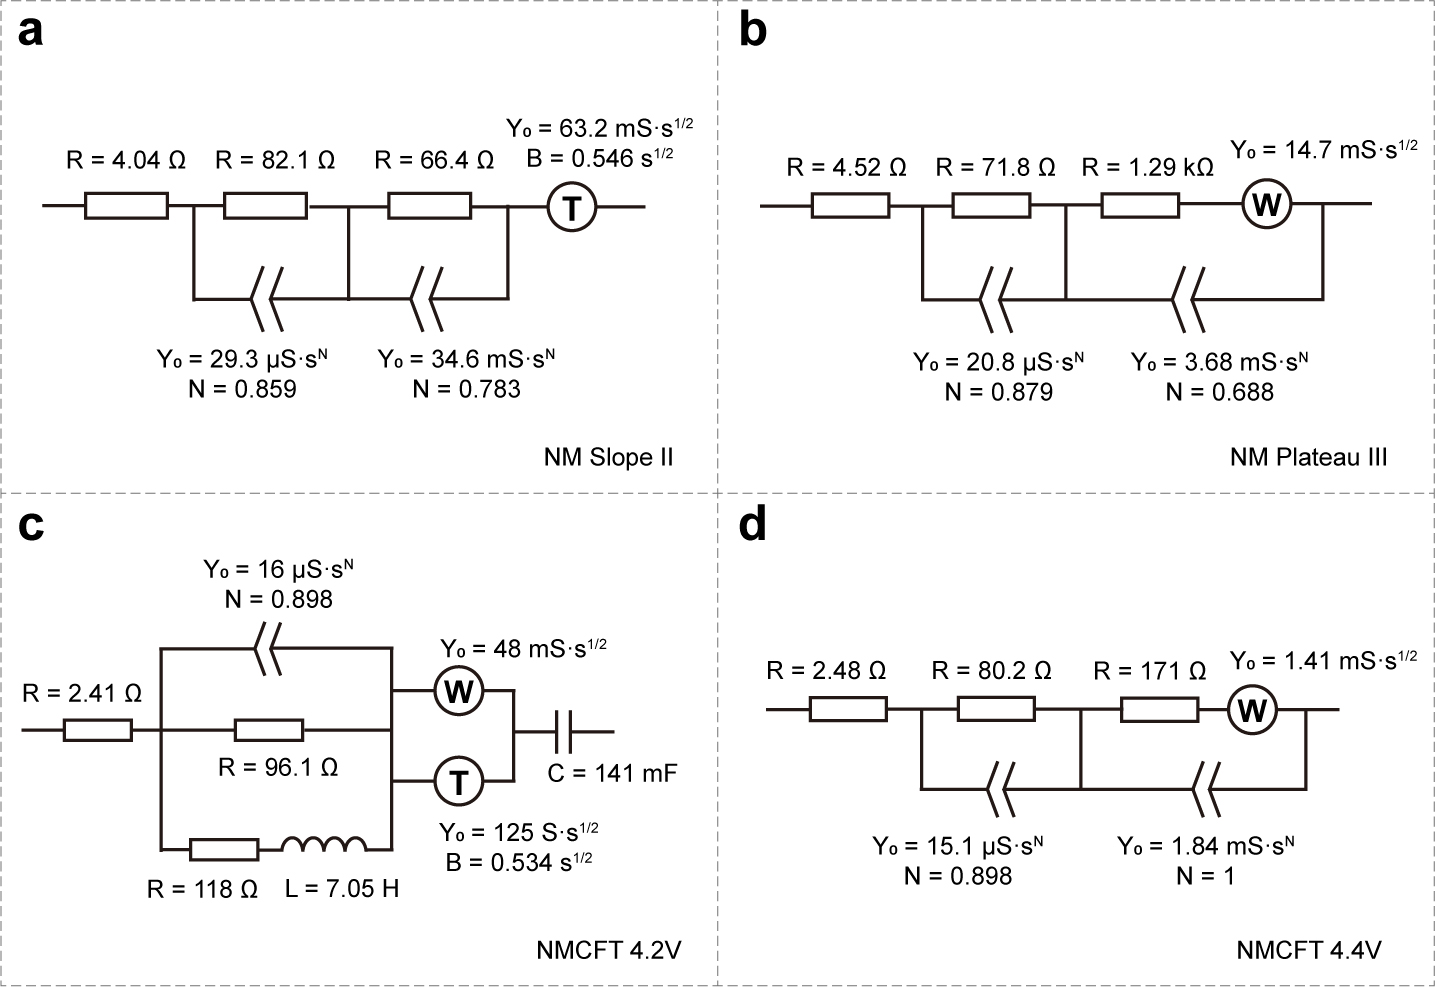


**Supplementary Figure 18.** Fitting circuits for special Nyquist plots in the three-electrode GITT-EIS measurements, and specific parameters of the corresponding components. Square: resistance; wavy: inductance; double folded line: constant phase angle element (CPE); double vertical line: capacitance; W: semi-finite linear diffusion impedance (Warburg impedance) for planar electrodes; T: finite boundary diffusion impedance for planar electrodes, also known as finite diffusion with reflective boundary.4,5


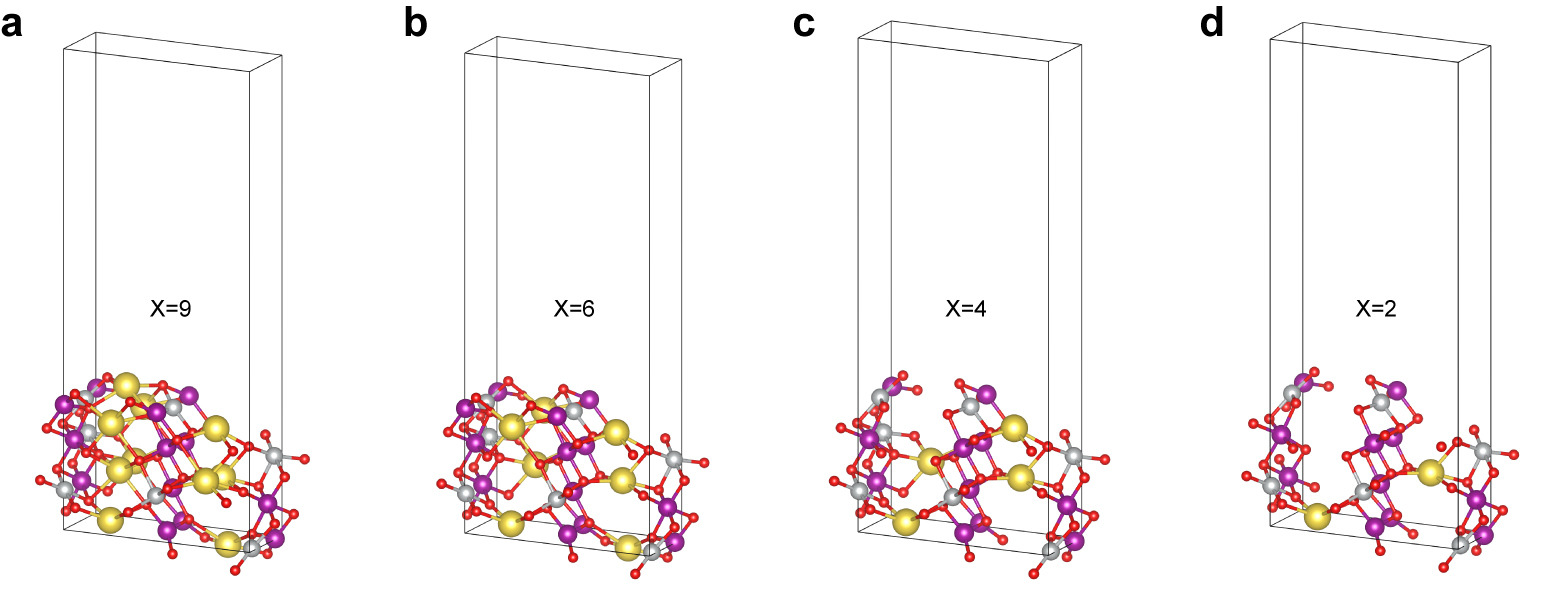


**Supplementary Figure 19.** Near surface model of NM with increasing potential and decreasing Na content. The change in potential is simulated by varying the number of Na atoms in the model.


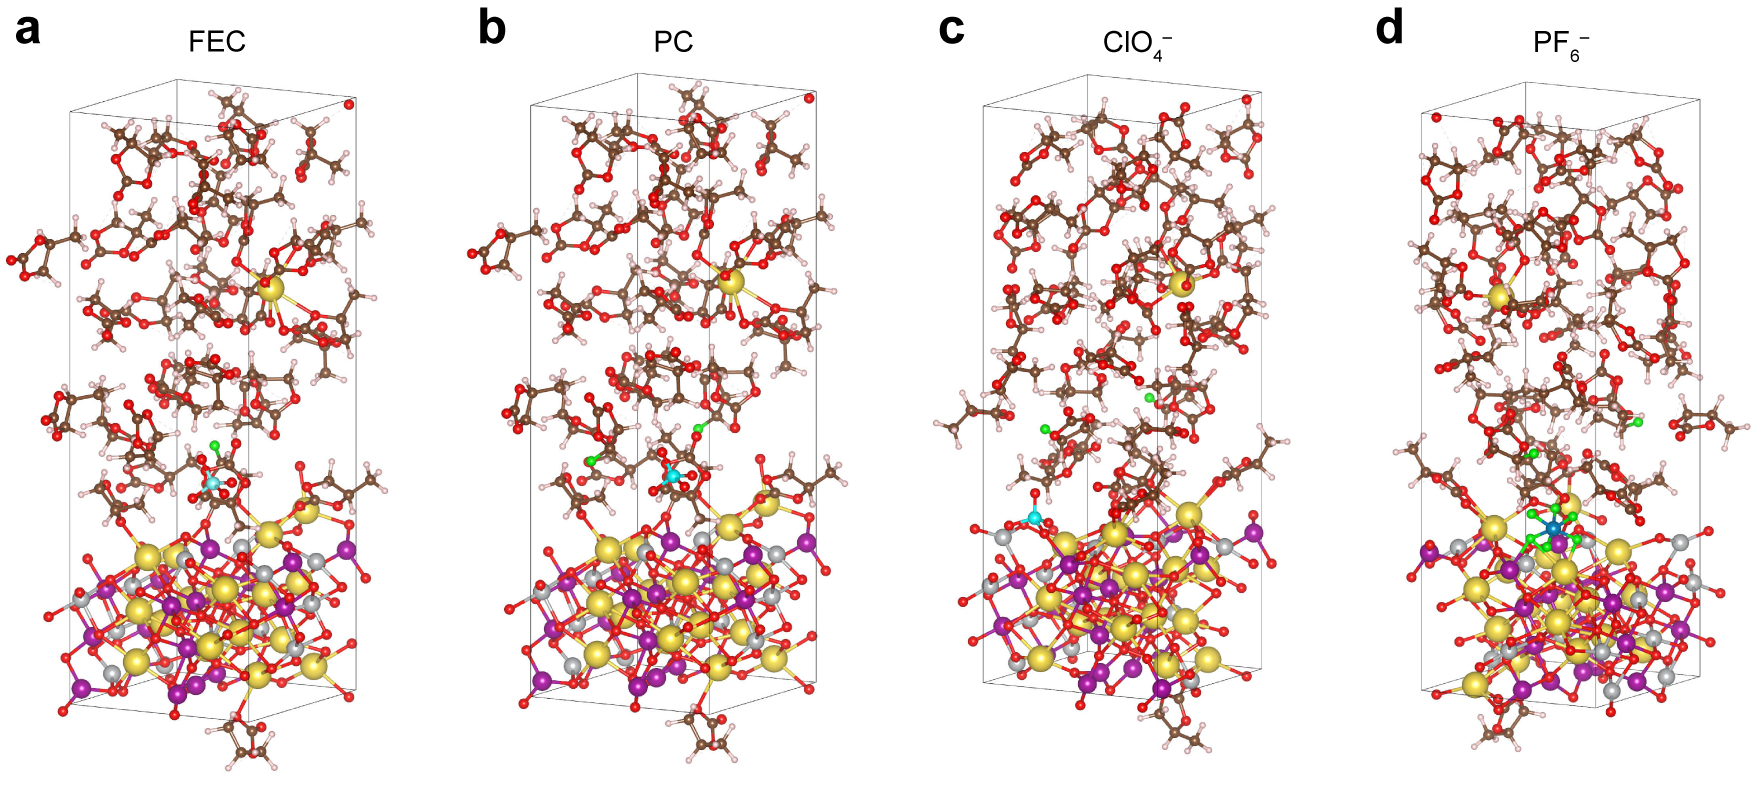


**Supplementary Figure 20.** Interfacial environment model of NM cathode for AIMD simulation. The model included the cathode surface with layered structure and complete electrolyte components described in detail in Method.


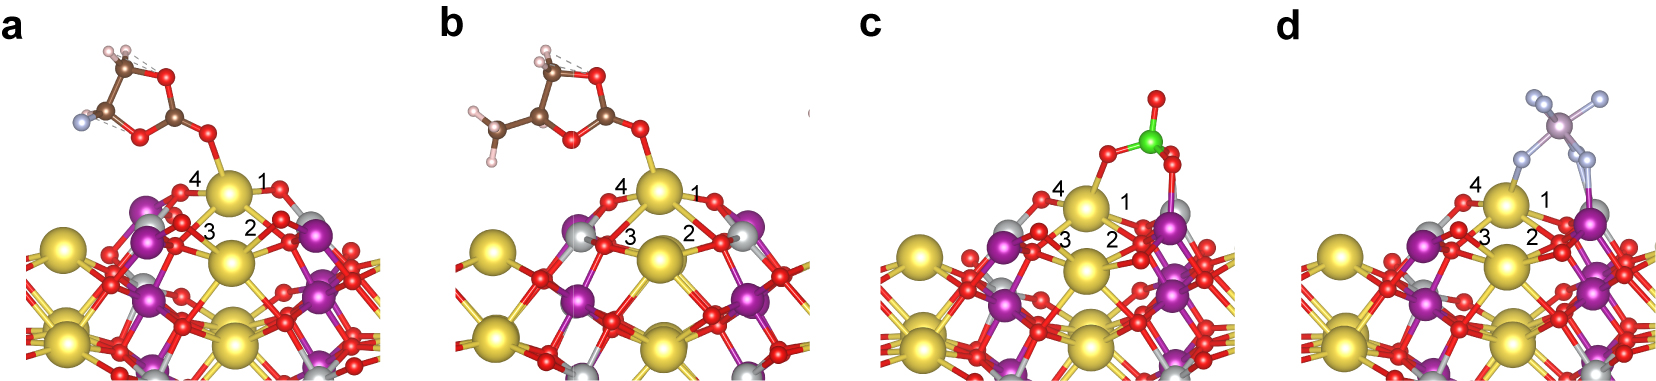


**Supplementary Figure 21.** Schematic modelling of the Na−O bonds that need to be broken when the Na atoms are deintercalated after adsorption of different groups. The adsorbed groups are PC (a), FEC (b), CIO–4 (c), PF–6 (d). Na−O bond length data are given in Supplementary Table 3.


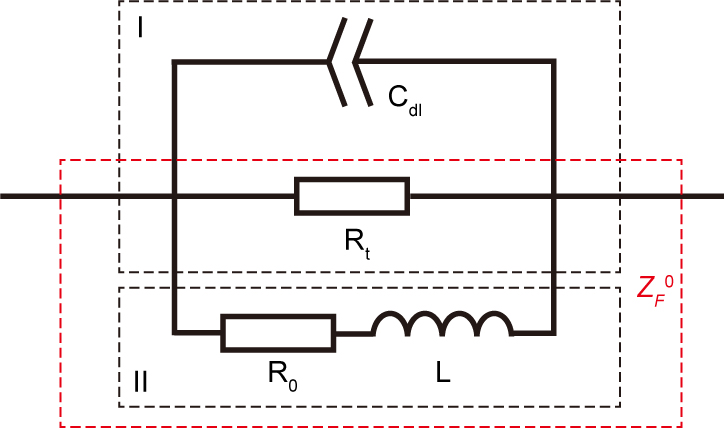


**Supplementary Figure 22.** Simplification of the equivalent circuits in Fig. 4e, retaining the equivalent circuits corresponding to the high-frequency capacitive arc (Part I) and the mid-frequency inductive loop (Part II). The Faraday resistance *Z* 0 *F* (the red dashed box) of the electrode surface is denoted by *Rt*//(*Ro+L*). *Rt* is the contact resistance, *Ro* is the equivalent resistance of the anion specific adsorption, and *L* is the equivalent inductance of the anion specific adsorption.


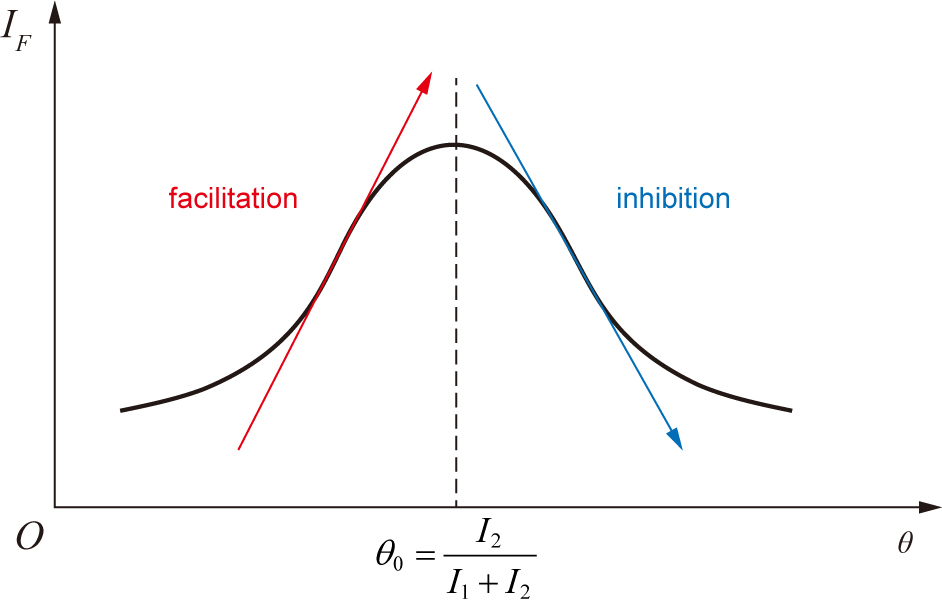


**Supplementary Figure 23.** Trends in Faraday current density *IF* on surface anion coverage *θ*. When the coverage is less than *θ*0, the anion specific adsorption process proceeds to facilitate the interfacial charge transfer, and when the coverage exceeds *θ*0, the anion specific adsorption hinders the ion/charge transport across the interface.


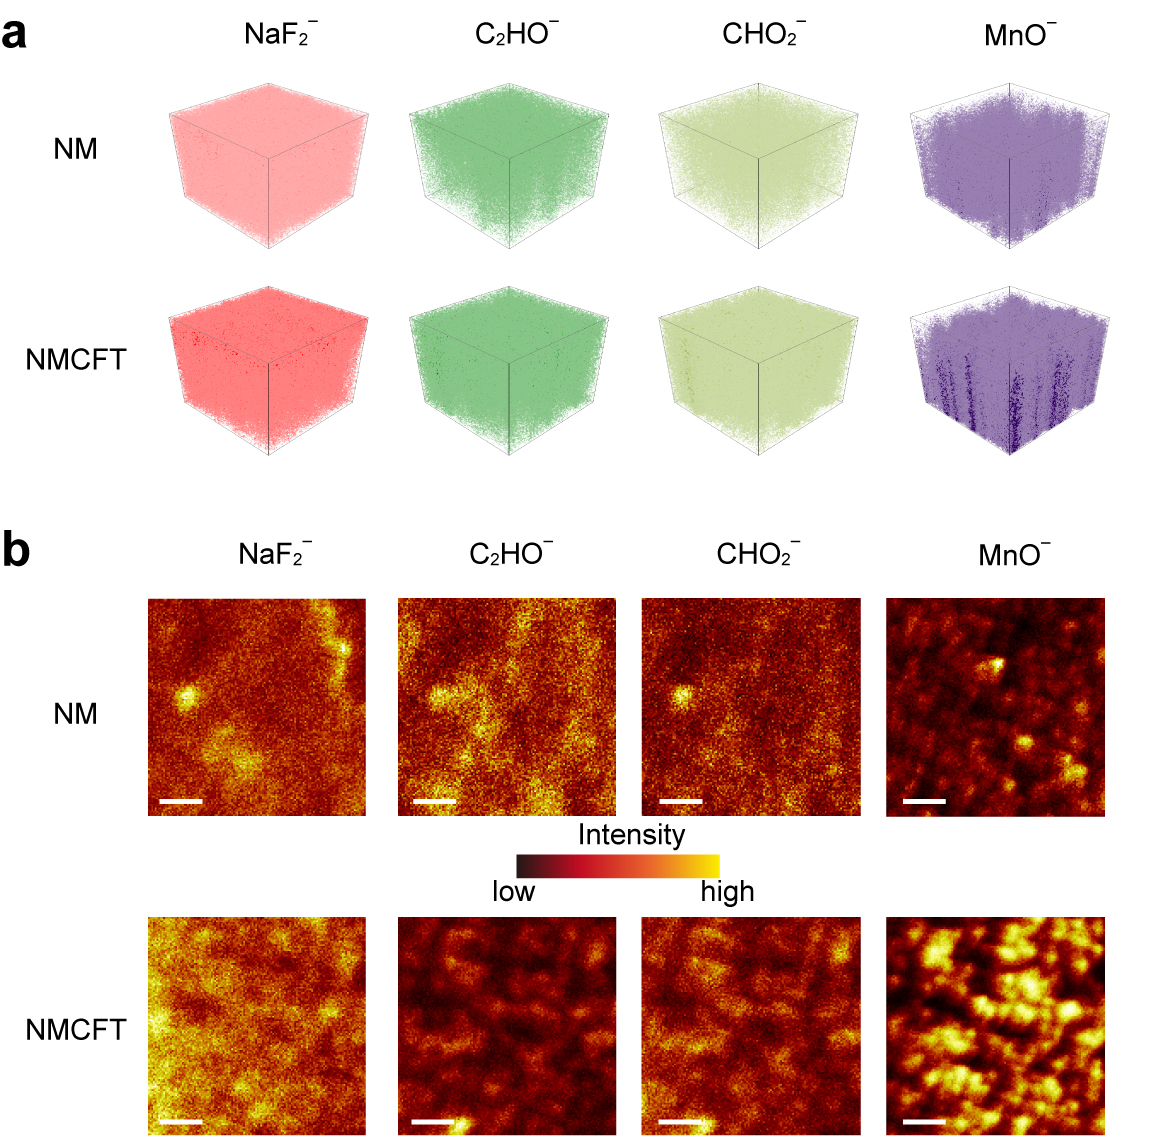


**Supplementary Figure 24.** 3D rendering fragments (a) and 2D intensity distributions (b) of ToF-SIMS for NM and NMCFT cathodes surface, with only one group represented in each image. Scale bars, 20 μm.


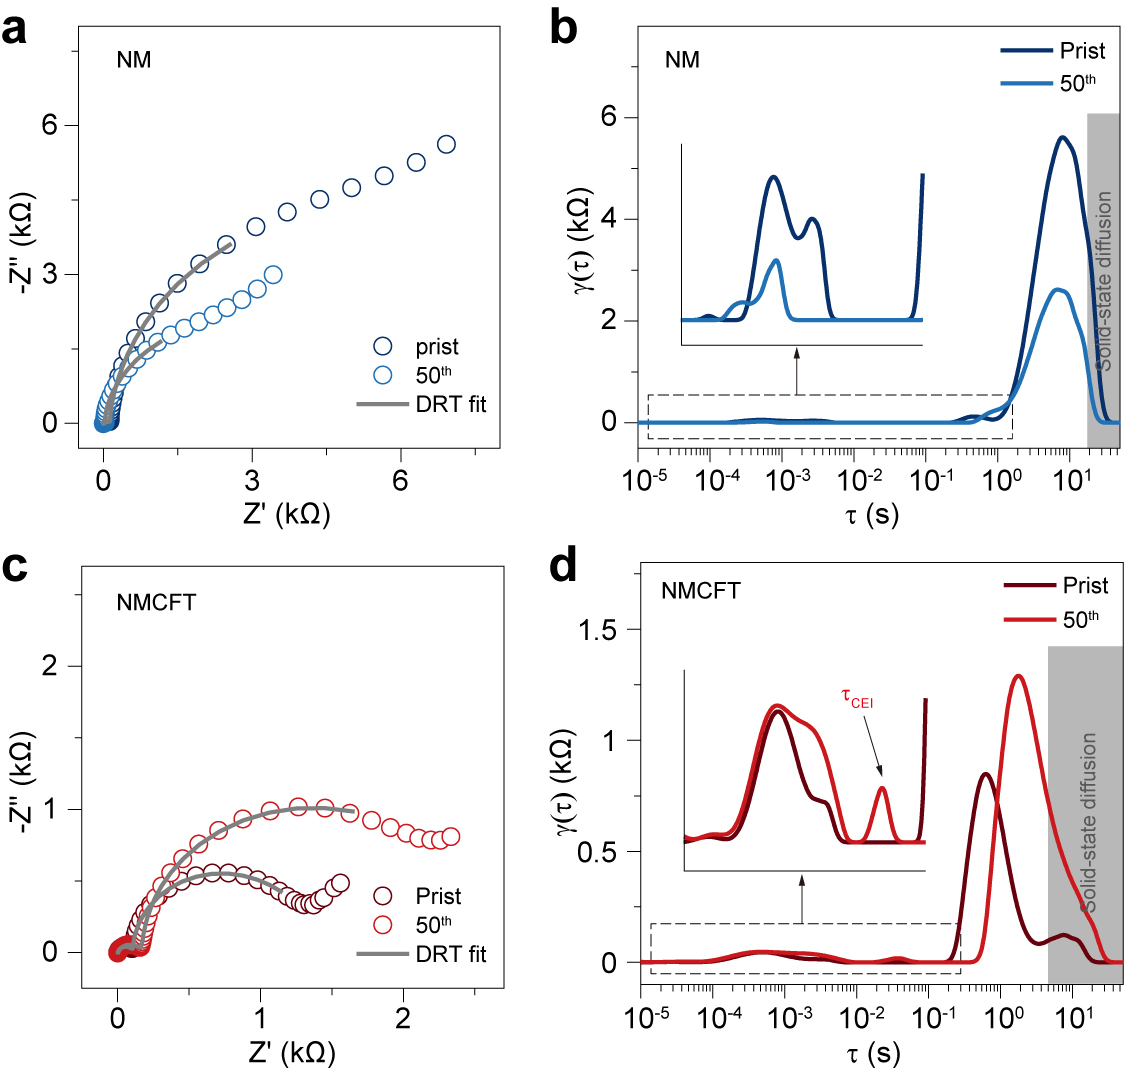


**Supplementary Figure 25.** EIS results and corresponding DRT spectra of NM (a, b) and NMCFT (c, d) in the pristine state and after cycling. 6,7 The grey line in the Nyquist plot is the curve obtained by DRT fitting using preprocessed EIS data. A new DRT peak appears for cycled NMCFT within a relaxation time scale of 10−2−10−1 s, which is determined by the ionic conductivity in the CEI.6,8


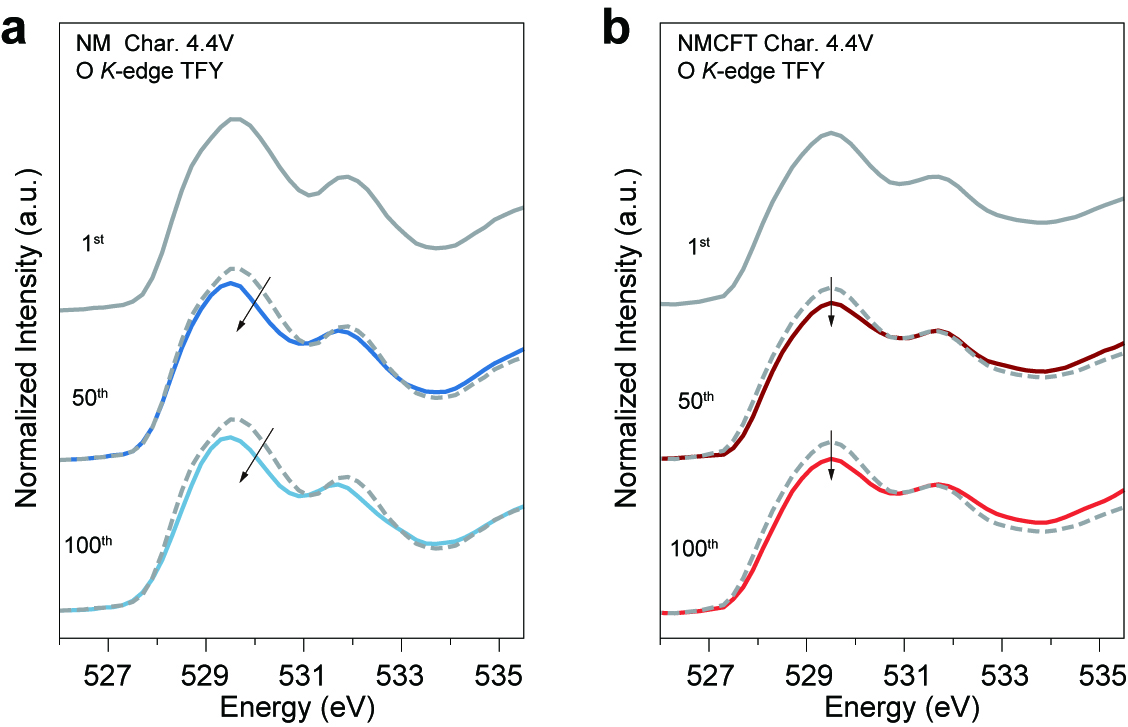


**Supplementary Figure 26.** O *K*-edge sXAS (TFY mode) at charged to 4.4 V SoC of NM (**a**) and NMCFT (**b**) after the 50th and 100th cycles. For comparison, the O *K*-edge sXAS at the first charged state are marked with grey dashed lines and overlaid with the spectra of the cycled state.

For NM, the pre-edge peaks of O *K*-edge show an overall shift and decay after cycling. The shift indicates severe lattice distortions and the phase transition from the layered structure to a redox-inactive rock-salt structure, in which TM *3d*−O *2p* orbitals remains consistently unhybridized.9 And the weakening of the overall peak intensity indicates the loss of lattice oxygen at the surface.10 In contrast, the *t2g* peak in the O *K*-edge of the NMCFT decreases slightly, indicating a minor distortion of the surface lattice, and the *2p* state of lattice oxygen keeps unchanged. The lattice oxygen remains redox-active even after 100 cycles, which is one of the reasons for the great high-voltage cycling stability of NMCFT.


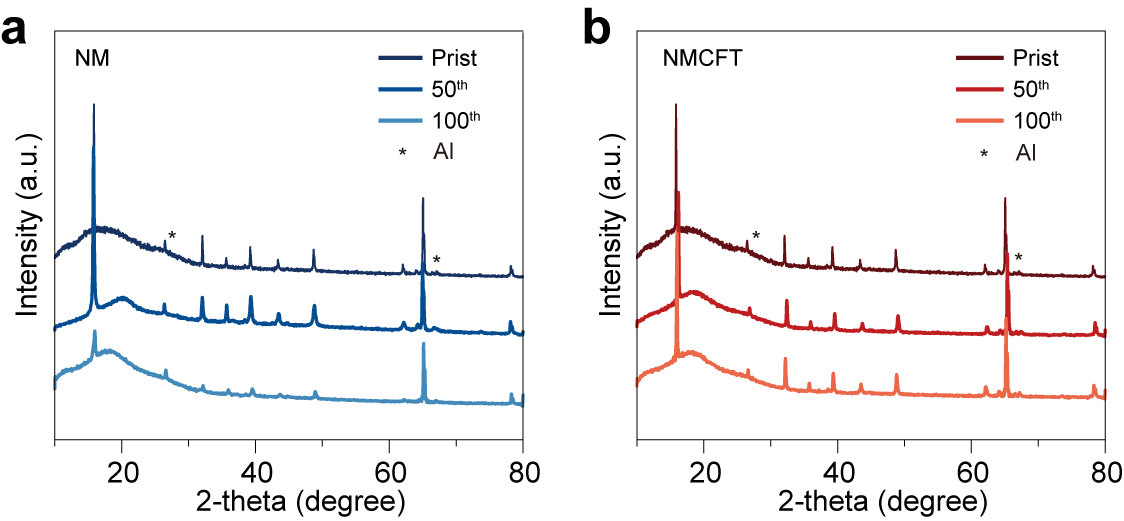


**Supplementary Figure 27.** XRD measurements of NM and NMCFT electrodes after 50 and 100 cycles at C/3. Intensity normalization was performed on all XRD spectra using the peak intensity of Al as a reference.


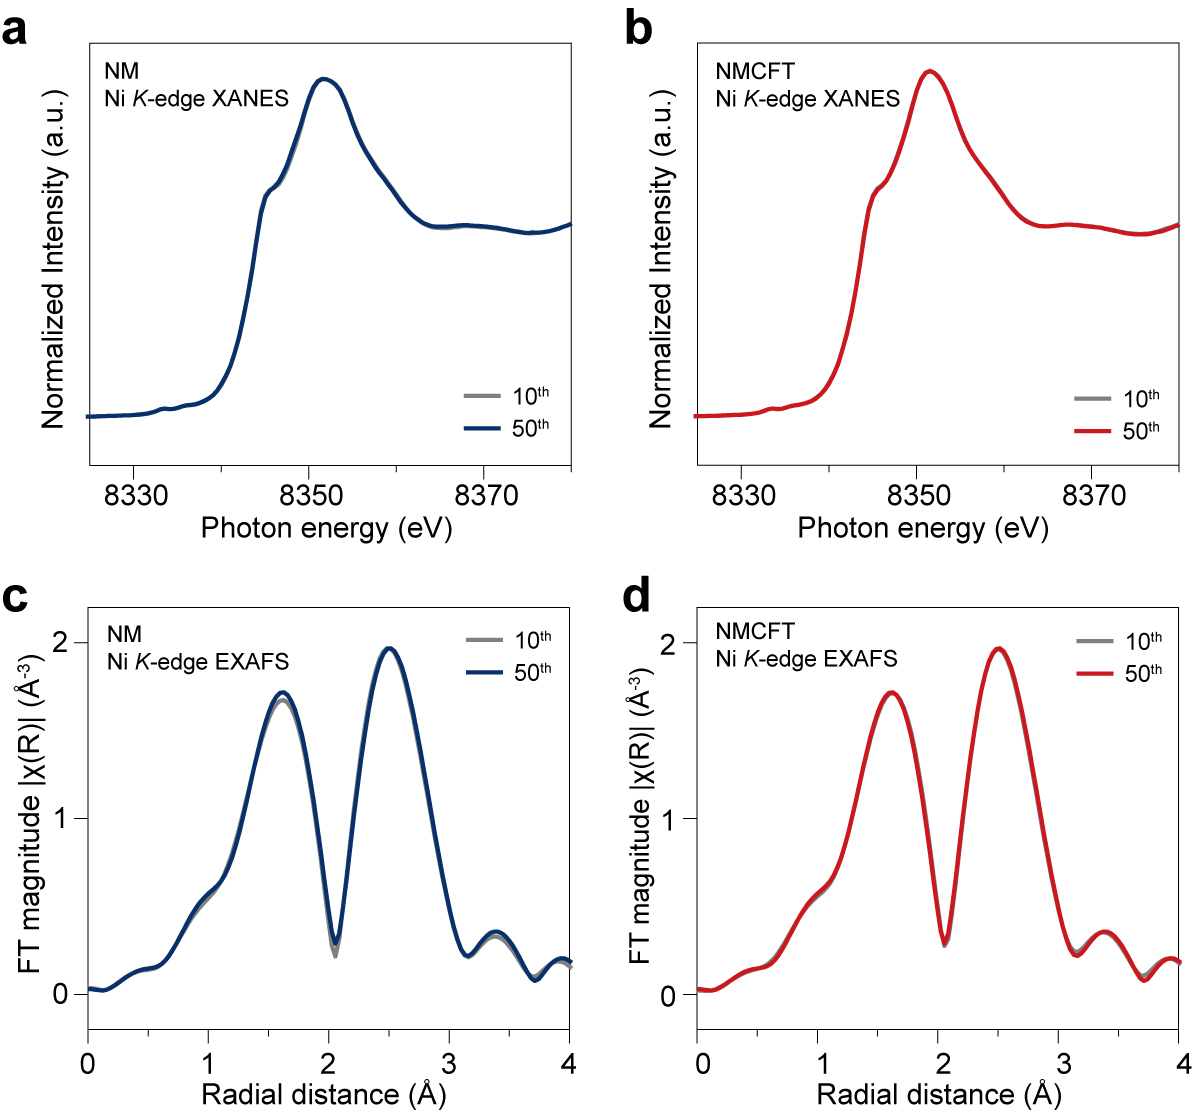


**Supplementary Figure 28.** Ni *K*-edge XANES of NM (a) and NMCFT (b) after 10 and 50 cycles. Ni *K*-edge EXAFS of NM (c) and NMCFT (d) after 10 and 50 cycles.


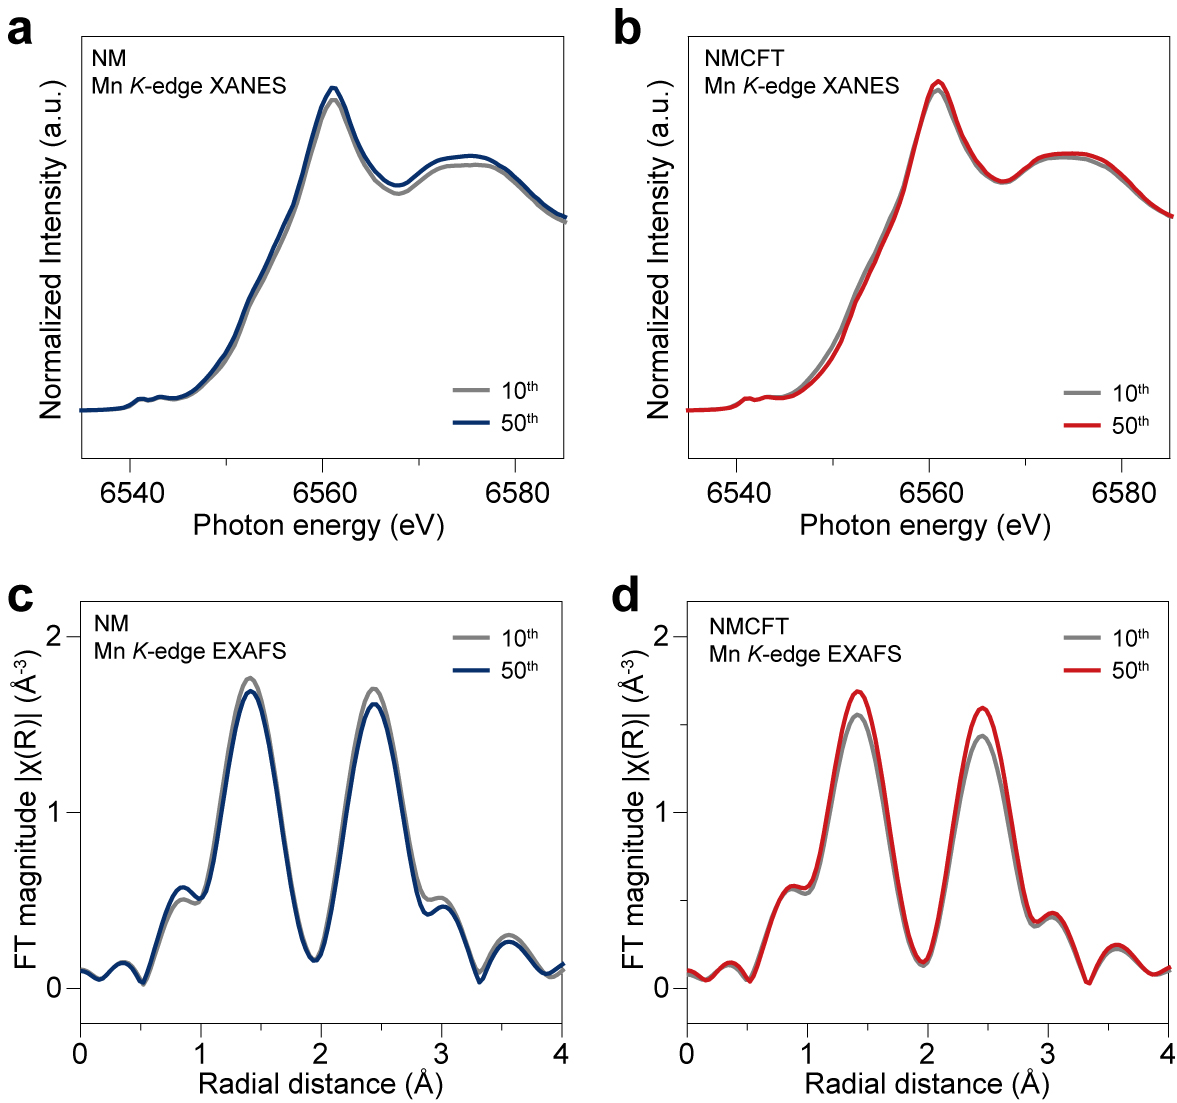


**Supplementary Figure 29.** Mn *K*-edge XANES of NM (a) and NMCFT (b) after 10 and 50 cycles. Mn *K*-edge EXAFS of NM (c) and NMCFT (d) after 10 and 50 cycles.


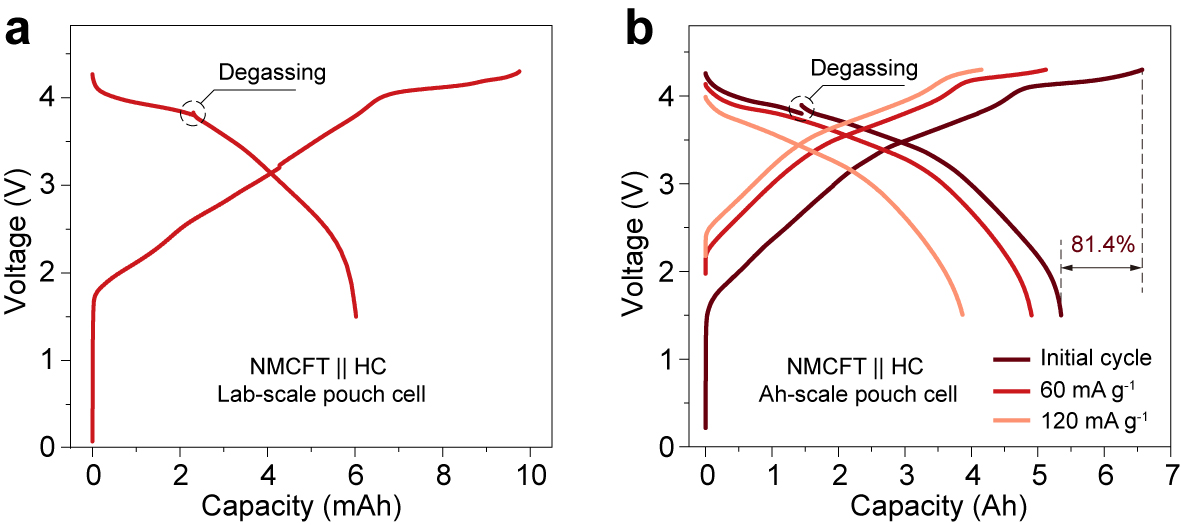


**Supplementary Figure 30.** GCDs of Lab-scale (a) and Ah-scale (b) pouch-type full cells. After the formation process of the first charge, the pouch cells were discharged to 3.8 V and then degassed and second-sealed.


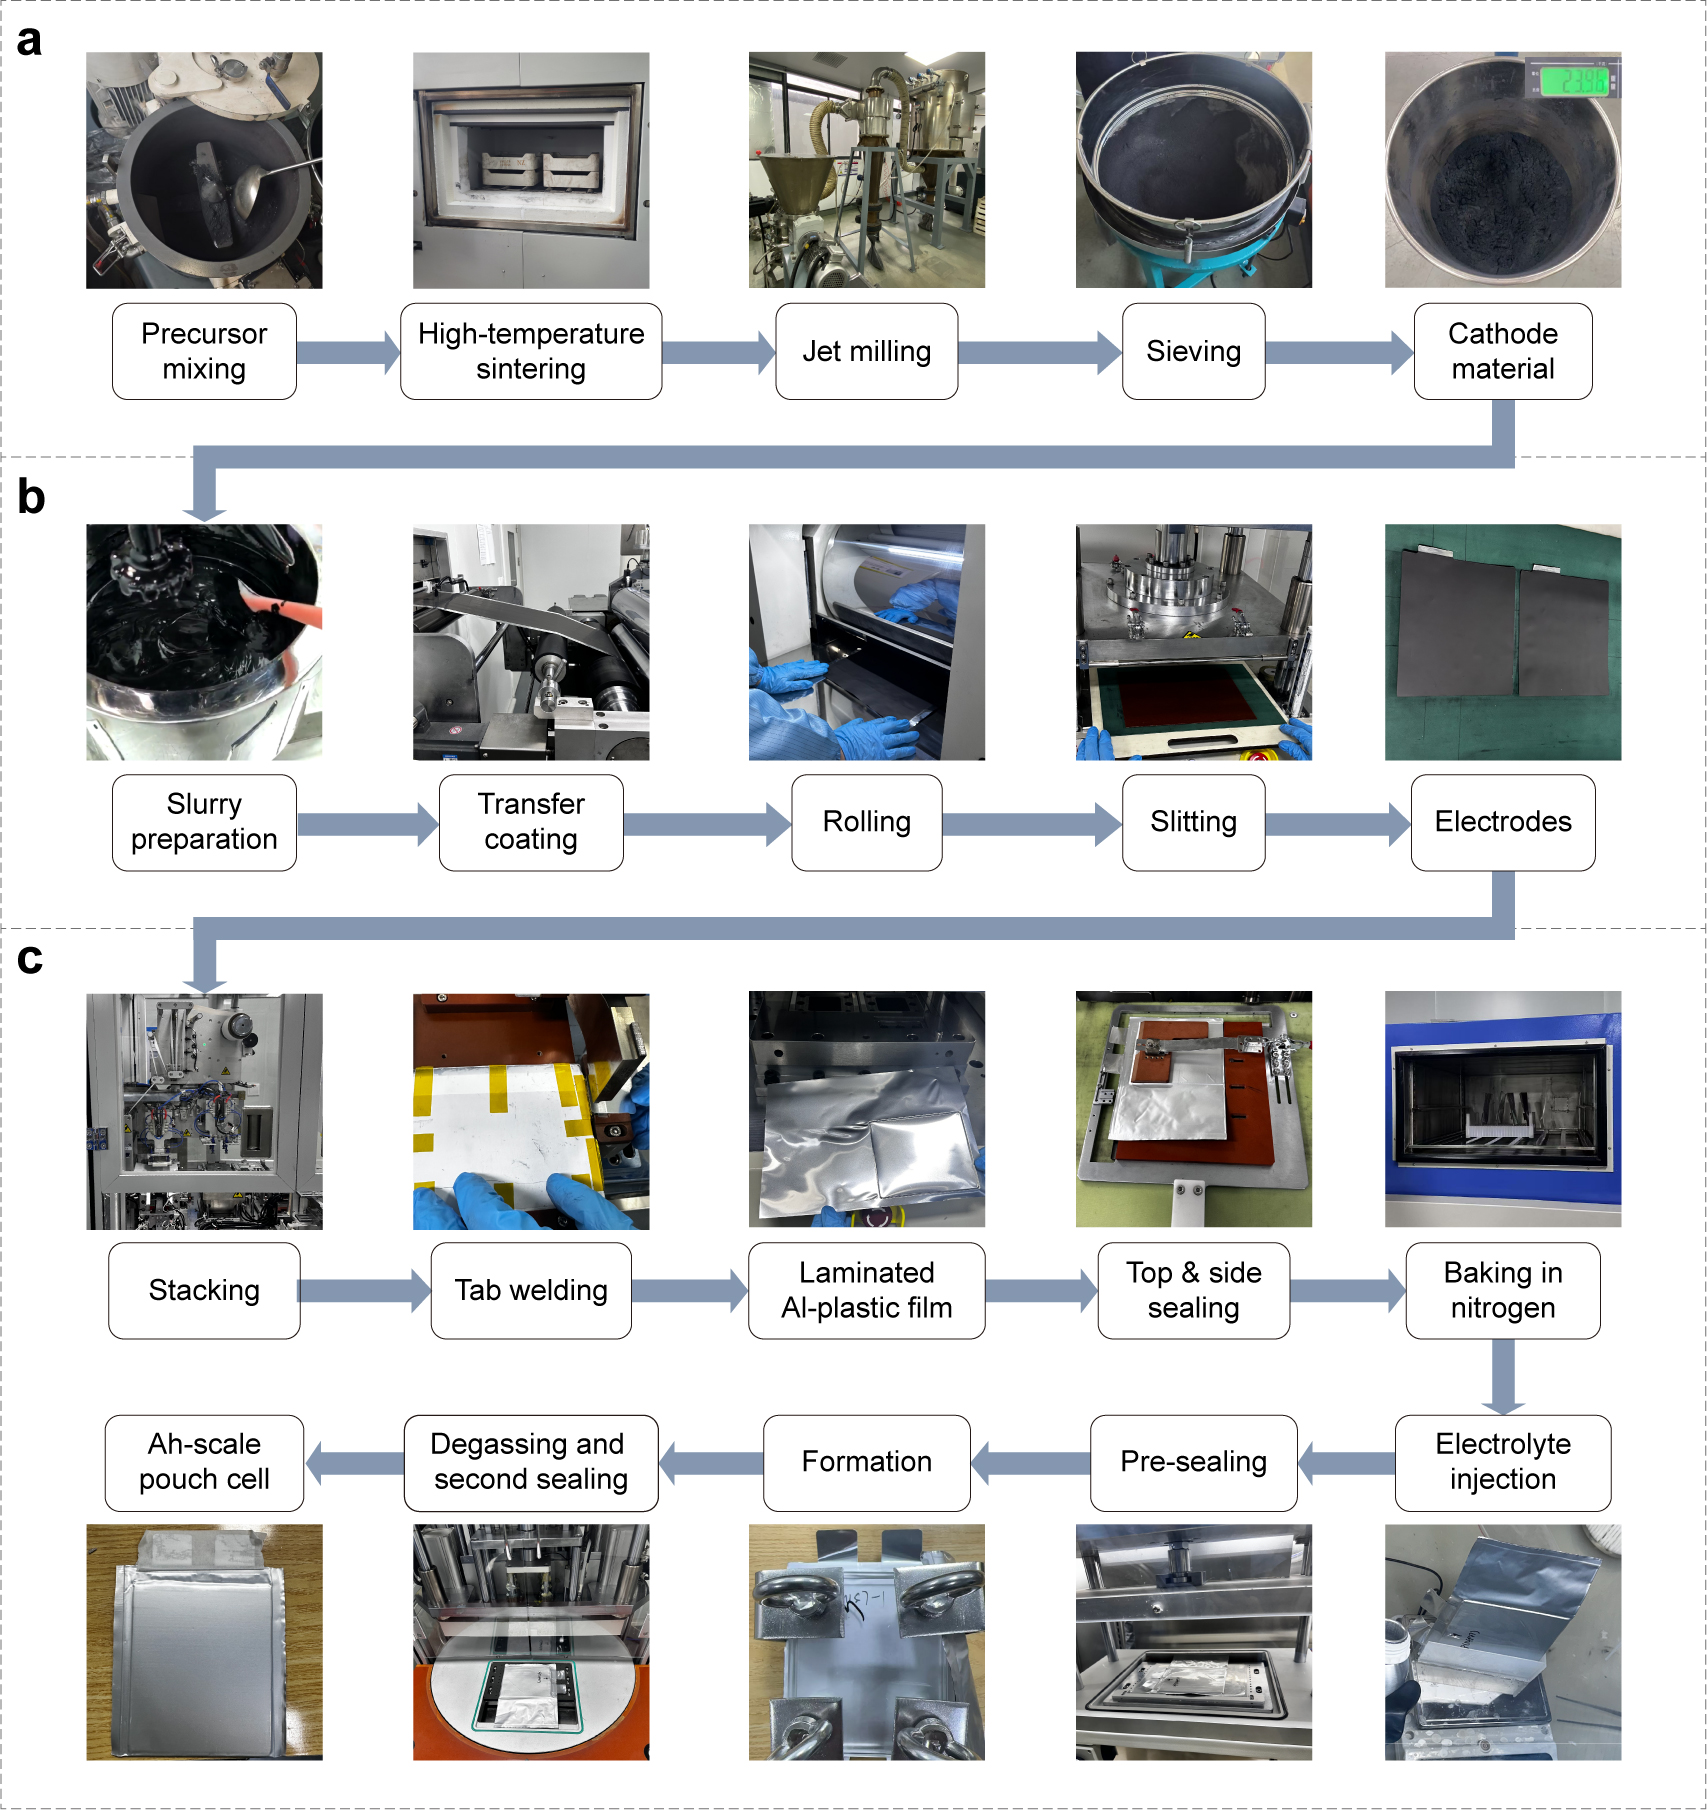


**Supplementary Figure 31.** Schematic diagrams of the assembly processes of Ah-scale pouch-type full cells, including NMCFT cathode active material preparation (a), cathode and anode electrodes preparation (b) and assembly of the NMCFT || HC pouch cells (c).


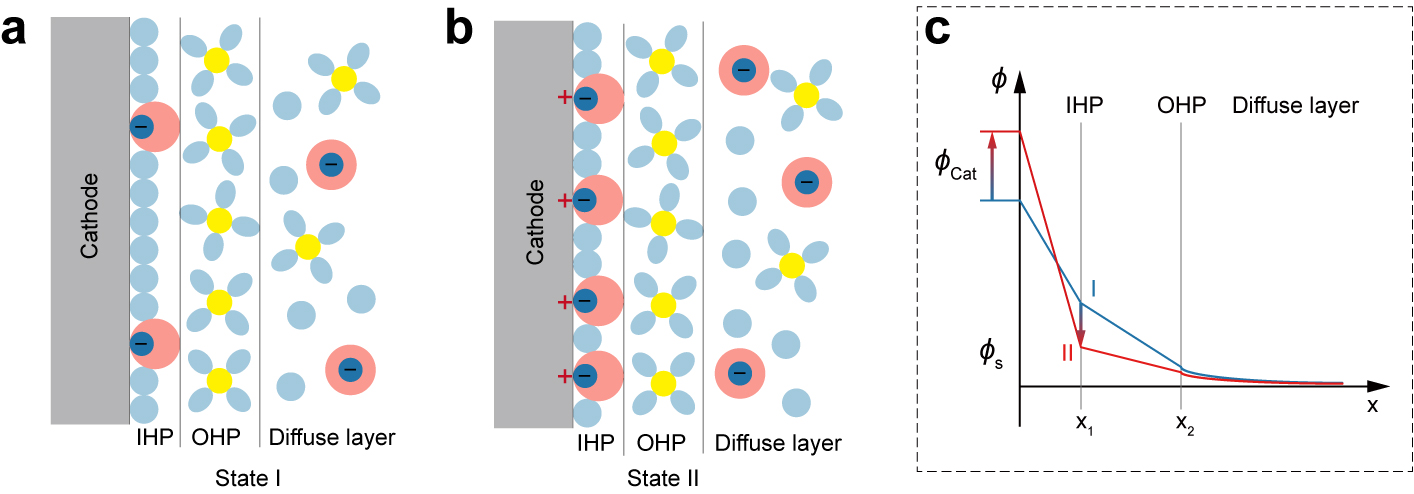


**Supplementary Figure 32.** Schematic diagrams of the initial state I (a) and the state II (b) after the increase of the anion specific adsorption coverage. And the prediction of the surface potential profile (c) for state I and II based on the *Gouy-Chapman-Stern* (GCS) model.11,12.

In the potential profile, **Cat represents the electrode potential of the cathode and **s represents the potential of the electrolyte. In the initial state, only a small number of anions are specifically adsorbed because the positive charge on the cathode surface is not enough to exert a strong electrostatic force on the free anions in the electrolyte. These anions do not have a considerable effect on the potential difference between the cathode and the electrolyte. When positive charges accumulate on the cathode surface, the anion specific adsorption process is intensified and the IHP formed by the adsorbed anions has a more negative potential. As a result, the potential difference(**Cat−**IHP) driving the surface charge transfer reaction becomes larger.

**Supplementary Table** **1** | Crystallographic parameters of NM refined by X-ray diffraction Rietveld refinement. Space group: *P*63/*mmc*, a = 2.8961(5) Å, c = 11.1714(7) Å, V = 81.14(9) Å3, Rwp = 3.891 %, GOF = 1.54.

| **Atom** | **Site** | **x** | **y** | **z** | **Frac** | **Uiso (Å2)** |
| --- | --- | --- | --- | --- | --- | --- |
| Nae | 2d | 2/3 | 1/3 | 1/4 | 0.5029 | 0.089(5) |
| Naf | 2b | 0 | 0 | 1/4 | 0.1971 | 0.118(3) |
| Ni | 2a | 0 | 0 | 0 | 0.3500 | 0.051(9) |
| Mn | 2a | 0 | 0 | 0 | 0.6500 | 0.051(9) |
| O | 4f | 2/3 | 1/3 | 0.08279 | 1.0000 | 0.002(9) |

**Supplementary Table 2** | Crystallographic parameters of NMCFT refined by X-ray diffraction Rietveld refinement. Space group: *P*63/*mmc*, a = 2.9086(4) Å, c = 11.1230(9) Å, V = 81.49(6) Å3, Rwp = 4.363%, GOF = 1.58.

| **Atom** | **Site** | **x** | **y** | **z** | **Frac** | **Uiso (Å2)** |
| --- | --- | --- | --- | --- | --- | --- |
| Nae | 2d | 2/3 | 1/3 | 1/4 | 0.4687 | 0.105(3) |
| Naf | 2b | 0 | 0 | 1/4 | 0.2313 | 0.012(1) |
| Ni | 2a | 0 | 0 | 0 | 0.2700 | 0.015(2) |
| Mn | 2a | 0 | 0 | 0 | 0.5300 | 0.015(2) |
| Cu | 2a | 0 | 0 | 0 | 0.0400 | 0.015(2) |
| Fe | 2a | 0 | 0 | 0 | 0.0800 | 0.015(2) |
| Ti | 2a | 0 | 0 | 0 | 0.0800 | 0.015(2) |
| O | 4f | 2/3 | 1/3 | 0.08928 | 1.0000 | 0.147(3) |

**Supplementary Table 3** **|** Bond lengths between Na atoms on the surface of the NM and surrounding O atoms after adsorbing different groups.

|  | **PC** | **FEC** | **ClO– 4** | **PF– 6** |
| --- | --- | --- | --- | --- |
| Na−O1 | 2.24824 | 2.2967 | 2.59378 | 2.72406 |
| Na−O2 | 3.09086 | 2.76733 | 2.43671 | 2.43335 |
| Na−O3 | 2.9476 | 2.68766 | 2.47591 | 2.54826 |
| Na−O4 | 2.24401 | 2.2813 | 2.28066 | 2.24502 |
| Average | 2.63268 | 2.50823 | 2.44677 | 2.48767 |

**Supplementary Table 4** | Parameters of the lab-scale pouch-type full cell.

| **Parameter** | **Value** |
| --- | --- |
| Specific capacity of P2-NMCFT | 130 mA h g−1 |
| Specific capacity of hard carbon | 300 mA h g−1 |
| Cathode mass loading (80%) | 2.72 mg cm−2 |
| Anode mass loading (94%) | 1.316 mg cm−2 |
| Active area (cathode) | 30 cm2 (5×6 cm2) |
| Anode area | 34.56 cm2 (5.4×6.4 cm2) |
| Separator area (Whatman GF/D) | 36.96 cm2 (5.6×6.6 cm2) |
| Theoretical capacity (calculated based on cathode) | 10.6 mA h |
| N/P ratio | 1.10±0.02 |

**Supplementary Table 5** | Parameters of the Ah-scale pouch-type full cell.

| **Parameter** | **Value** |
| --- | --- |
| Specific capacity of NMCFT | 130 mA h g−1 |
| Specific capacity of hard carbon | 300 mA h g−1 |
| Cathode mass loading (96.3%) | 16 mg cm−2 |
| Anode mass loading (94%) | 7.6 mg cm−2 |
| Active area (cathode) | 10×12 cm2 |
| Anode area | 10.2×12.2 cm2 |
| N/P ratio | 1.10±0.01 |
| Separator width | 12.6 cm |
| Surface density of separator | 11.0±2.0 g m−2 |
| Electrolyte | 4 g A−1 h−1 |
| Current collector thickness (Al foil) | 12 μm |
| Theoretical capacity | 4.8 A h |
| Practical capacity | 5.6 A h |
| Energy density | 156 W h kg−1 |

**Supplementary References**

1 Halldin Stenlid, J. et al. Computational insights into electrolyte-dependent Li-ion charge-transfer kinetics at the LixCoO2 interface. *ACS Energy Lett.* **9**, 3608-3617 (2024).

2 Li, B. et al. Correlating ligand-to-metal charge transfer with voltage hysteresis in a Li-rich rock-salt compound exhibiting anionic redox. *Nat. Chem.* **13**, 1070-1080 (2021).

3 Wang, P.-F. et al. Na+/vacancy disordering promises high-rate Na-ion batteries. *Sci. Adv.* **4**, eaar6018 (2018).

4 C, H., I, D., Raistrick. & R, A., Huggins. Application of A-C techniques to the study of lithium diffusion in tungsten trioxide thin films. *J. Electrochem. Soc.* **127**, 343 (1980).

5 Thomas B, H., Paul S, T., William H, S. & Henry S, W. Impedance analysis of poly(vinylferrocene) films:The dependence of diffusional charge transport and exchange current density on polymer oxidation dtate. *J. Electrochem. Soc.* **134**, 2198 (1987).

6 Lu, Y., Zhao, C.-Z., Huang, J.-Q. & Zhang, Q. The timescale identification decoupling complicated kinetic processes in lithium batteries. *Joule* **6**, 1172-1198 (2022).

7 Ciucci, F. Modeling electrochemical impedance spectroscopy. *Curr. Opin. Electrochem.* **13**, 132-139 (2019).

8 Chen, J., Quattrocchi, E., Ciucci, F. & Chen, Y. Charging processes in lithium-oxygen batteries unraveled through the lens of the distribution of relaxation times. *Chem* **9**, 2267-2281 (2023).

9 Hu, E. et al. Evolution of redox couples in Li- and Mn-rich cathode materials and mitigation of voltage fade by reducing oxygen release. *Nat. Energy* **3**, 690-698 (2018).

10 Yan, P. et al. Injection of oxygen vacancies in the bulk lattice of layered cathodes. *Nat. Nanotechnol.* **14**, 602-608 (2019).

11 Stern, O. Zur theorie der elektrolytischen doppelschicht. *Z. Elektrochem. Angew. Phys. Chem.* **30**, 508-516 (2014).

12 Grahame, D. C. The electrical double layer and the theory of electrocapillarity. *Chem. Rev.* **41**, 441-501 (1947).
